# Supplementary material for: Sensitivity of field isolates of Eimeria acervulina and E. maxima from three regions in Brazil to eight anticoccidial drugs
Source: PubMed Central journal article supplement — Poult Sci. 2021 May 6;100(8):101233. doi: 10.1016/j.psj.2021.101233 (PMC8243008; doi:10.1016/j.psj.2021.101233), 2021-05-06

## SUPPLEMENTARY MATERIAL

### Sensitivity of Field Isolates of *Eimeria acervulina* and *E. maxima* from Three Regions in Brazil to Eight Anticoccidial Drugs

**TABLE.** DESCRIPTION OF THE SUPPLEMENTARY MATERIAL

| <b>PAGE</b> | <b>Parameter</b>            | <b>Challenge</b>     | <b>AST</b> |
|-------------|-----------------------------|----------------------|------------|
| 2           | Body Weight Gain (BWG)      | <i>E. acervulina</i> | 2 and 3    |
| 3           | Body Weight Gain (BWG)      | <i>E. acervulina</i> | 2 and 3    |
| 4           | Body Weight Gain (BWG)      | <i>E. maxima</i>     | 1 and 4    |
| 5           | Body Weight Gain (BWG)      | <i>E. maxima</i>     | 1 and 4    |
| 6           | Feed Conversion Ratio (FCR) | <i>E. acervulina</i> | 2 and 3    |
| 7           | Feed Conversion Ratio (FCR) | <i>E. acervulina</i> | 2 and 3    |
| 8           | Feed Conversion Ratio (FCR) | <i>E. maxima</i>     | 1 and 4    |
| 9           | Feed Conversion Ratio (FCR) | <i>E. maxima</i>     | 1 and 4    |
| 10          | Lesion Score (LS)           | <i>E. acervulina</i> | 2 and 3    |
| 11          | Lesion Score (LS)           | <i>E. acervulina</i> | 2 and 3    |
| 12          | Lesion Score (LS)           | <i>E. maxima</i>     | 1 and 4    |
| 13          | Lesion Score (LS)           | <i>E. maxima</i>     | 1 and 4    |
| 14          | OAA (POAA)                  | <i>E. acervulina</i> | 2 and 3    |
| 15          | OAA (POAA)                  | <i>E. acervulina</i> | 2 and 3    |
| 16          | OAA (POAA)                  | <i>E. maxima</i>     | 1 and 4    |
| 17          | OAA (POAA)                  | <i>E. maxima</i>     | 1 and 4    |

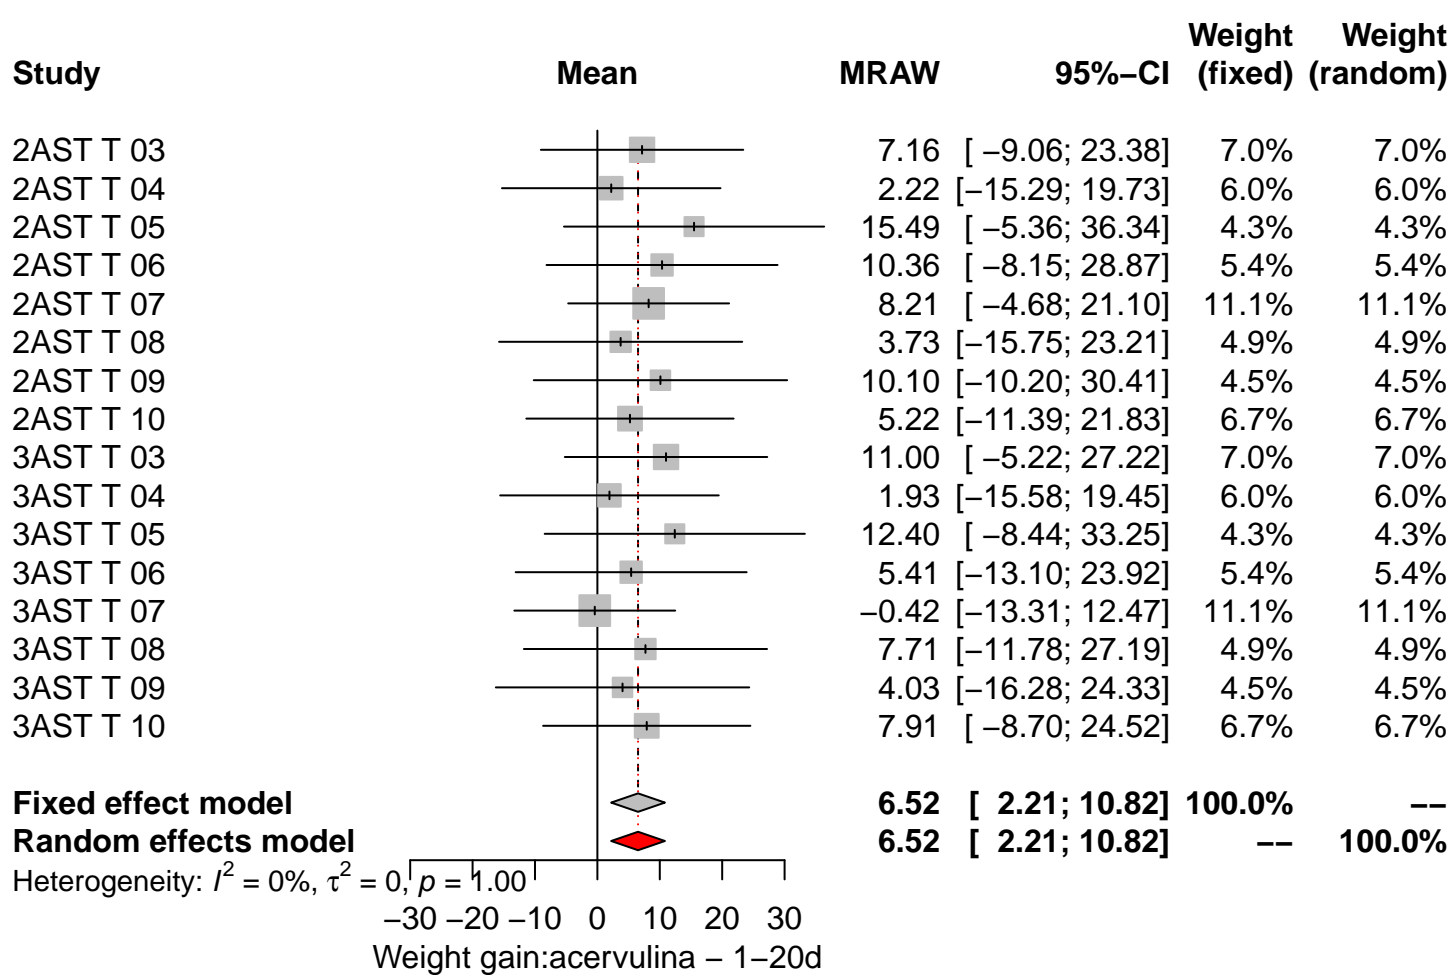

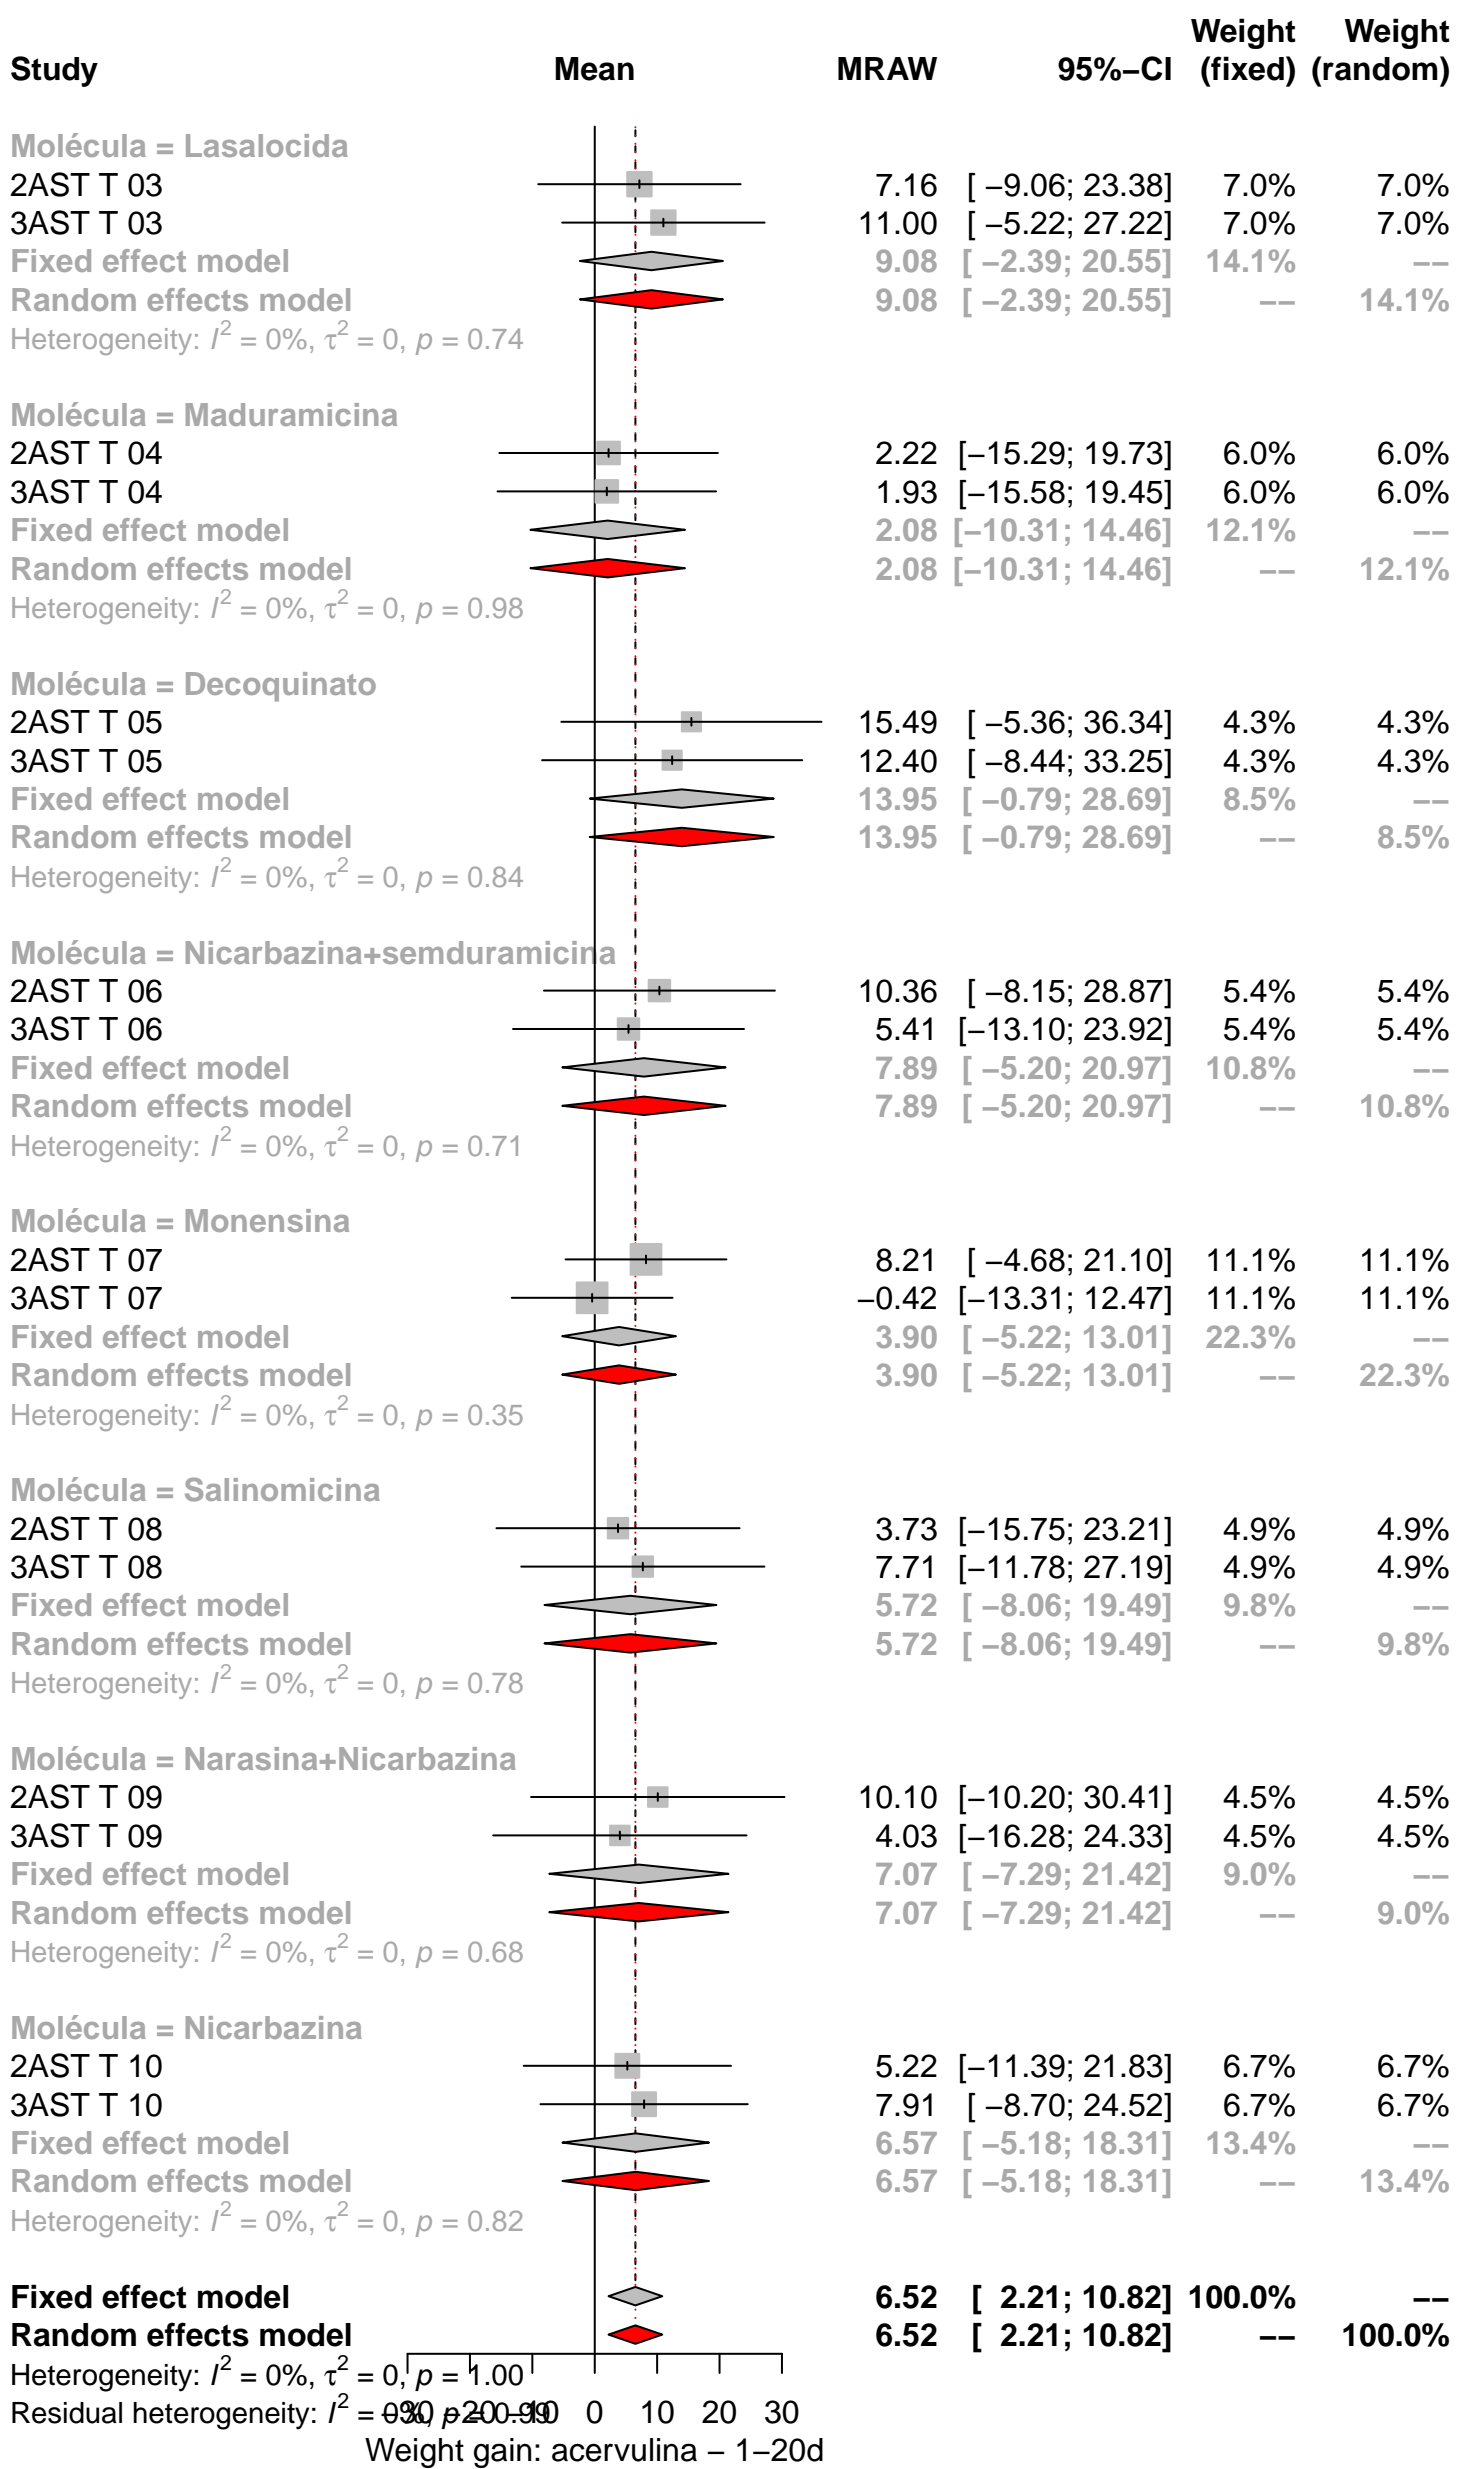

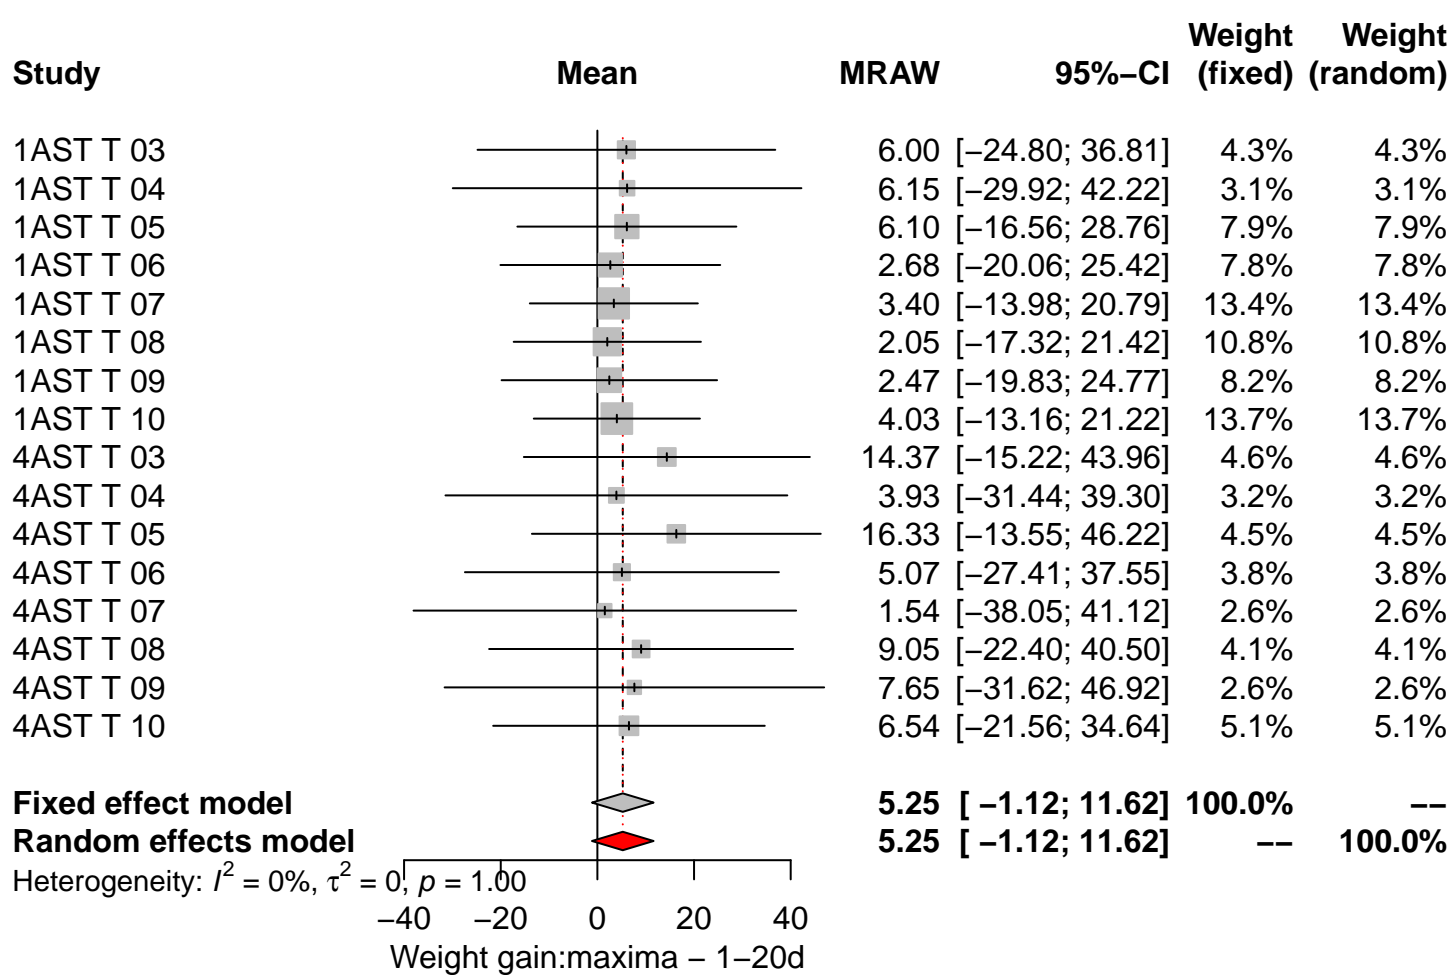

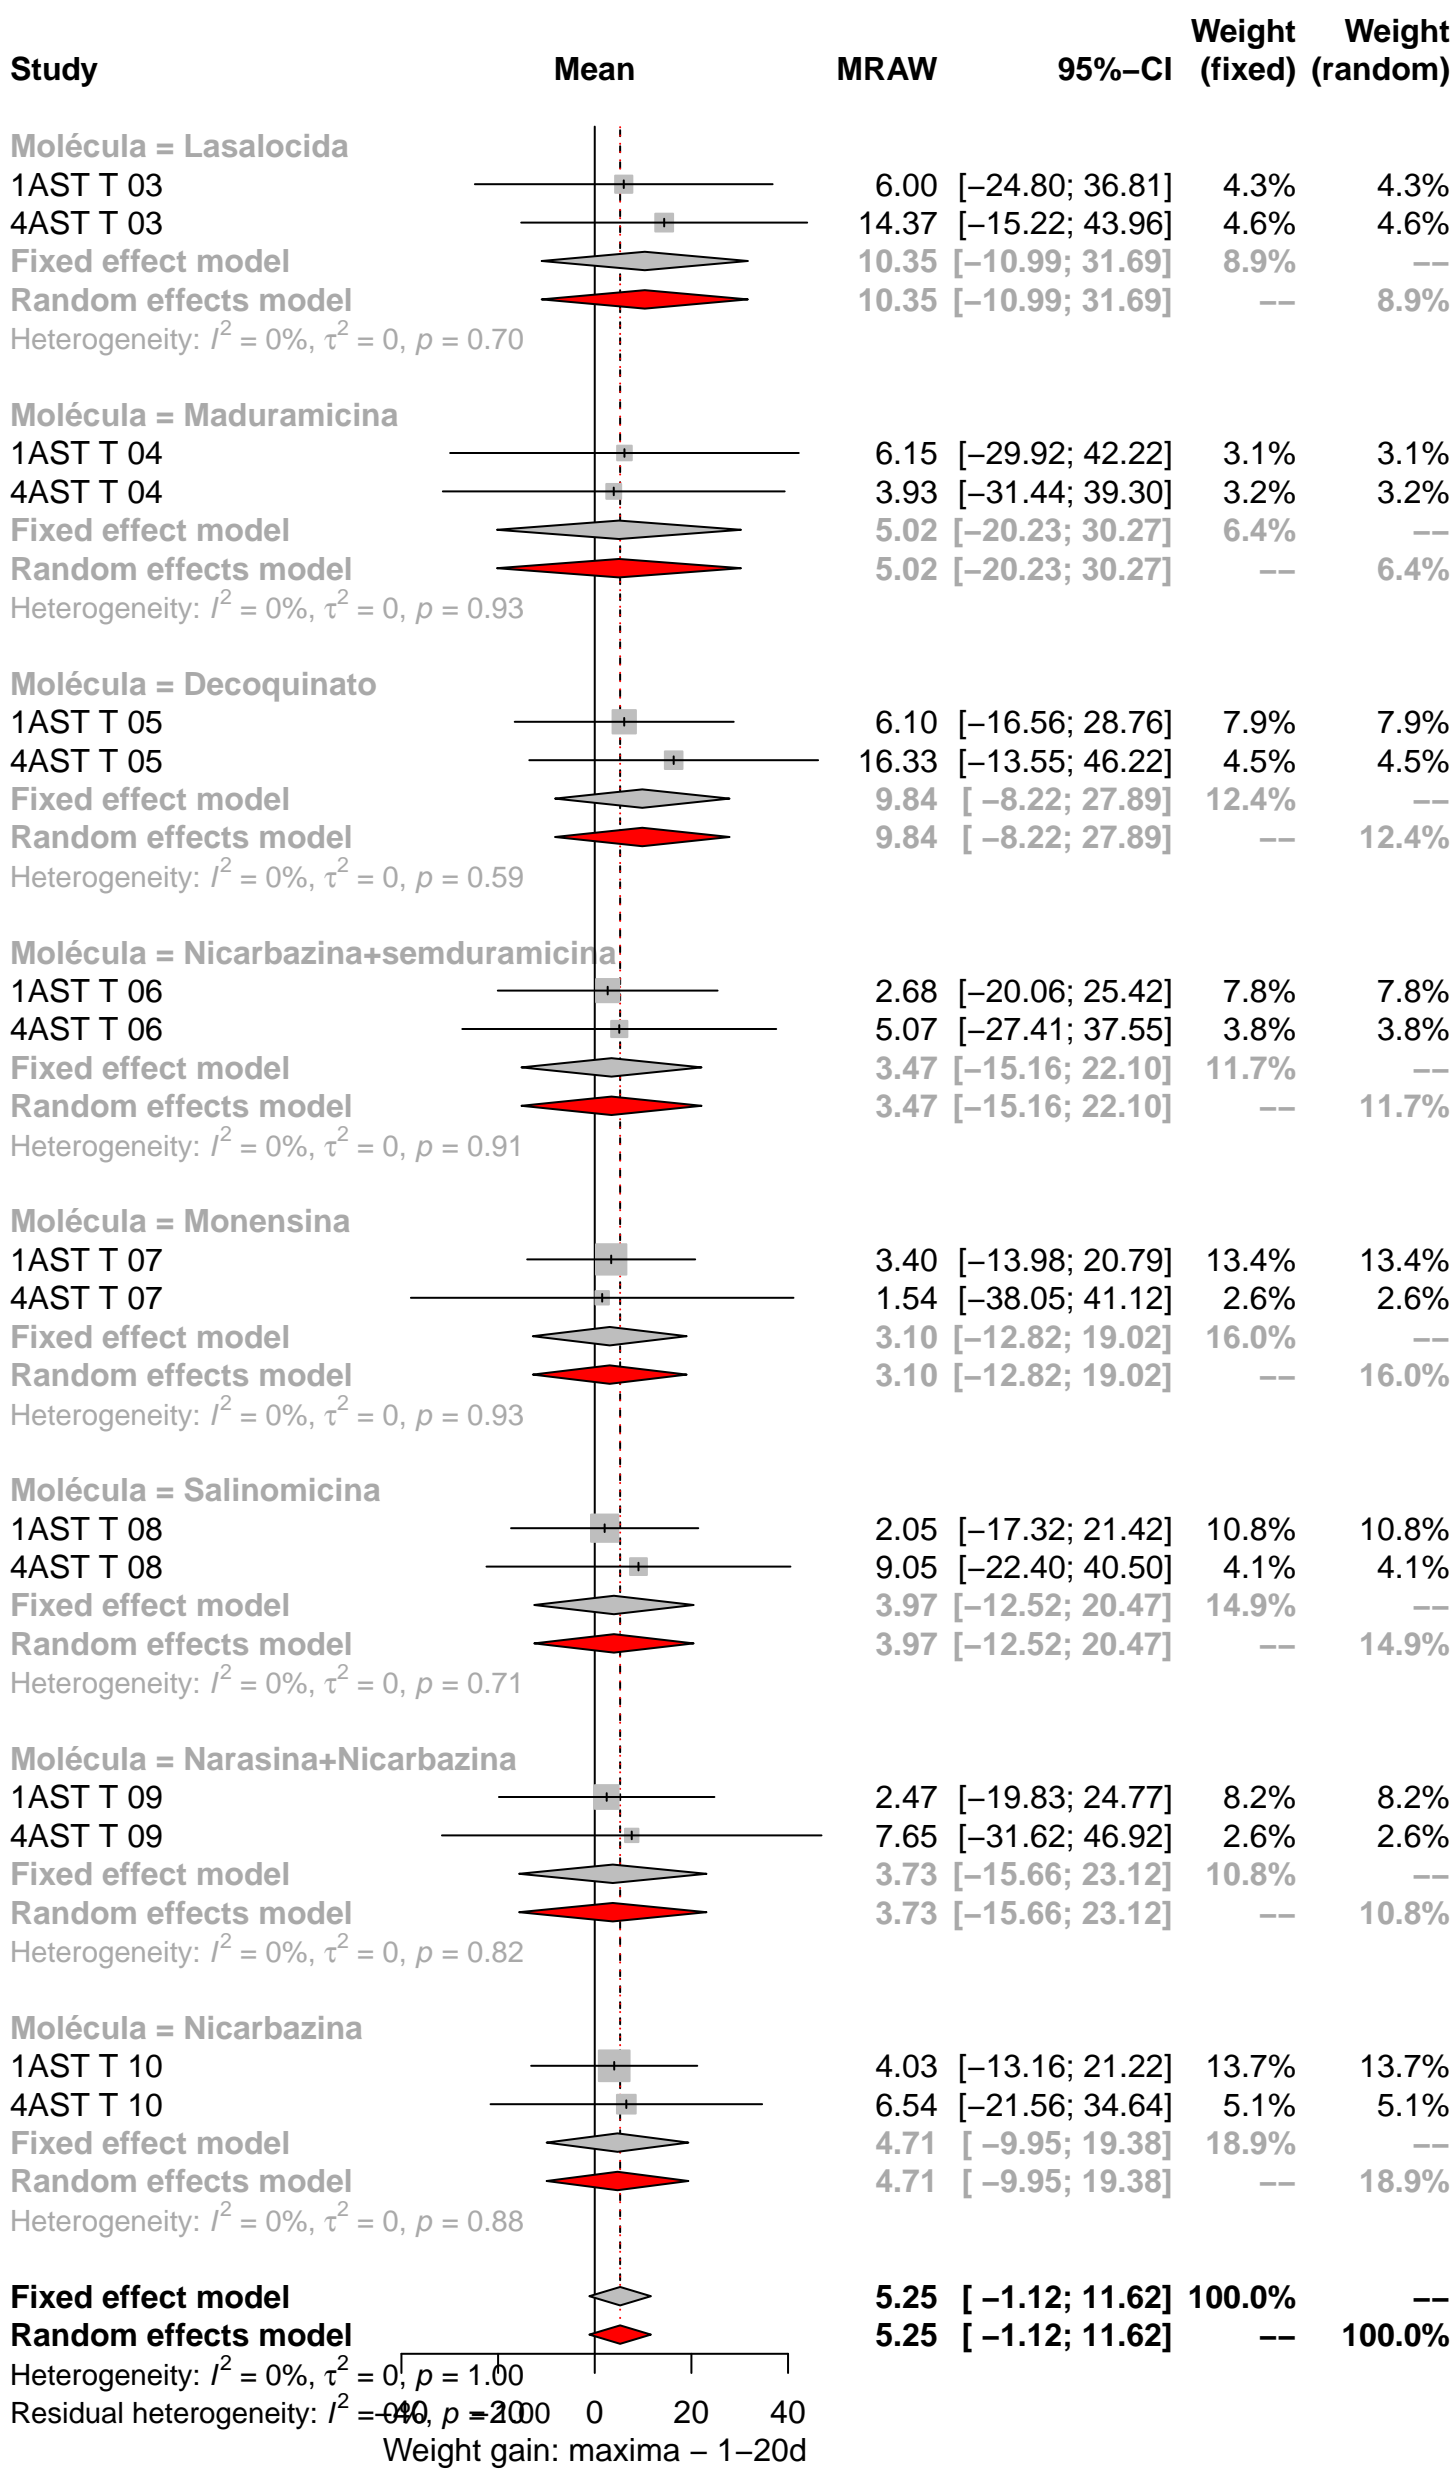

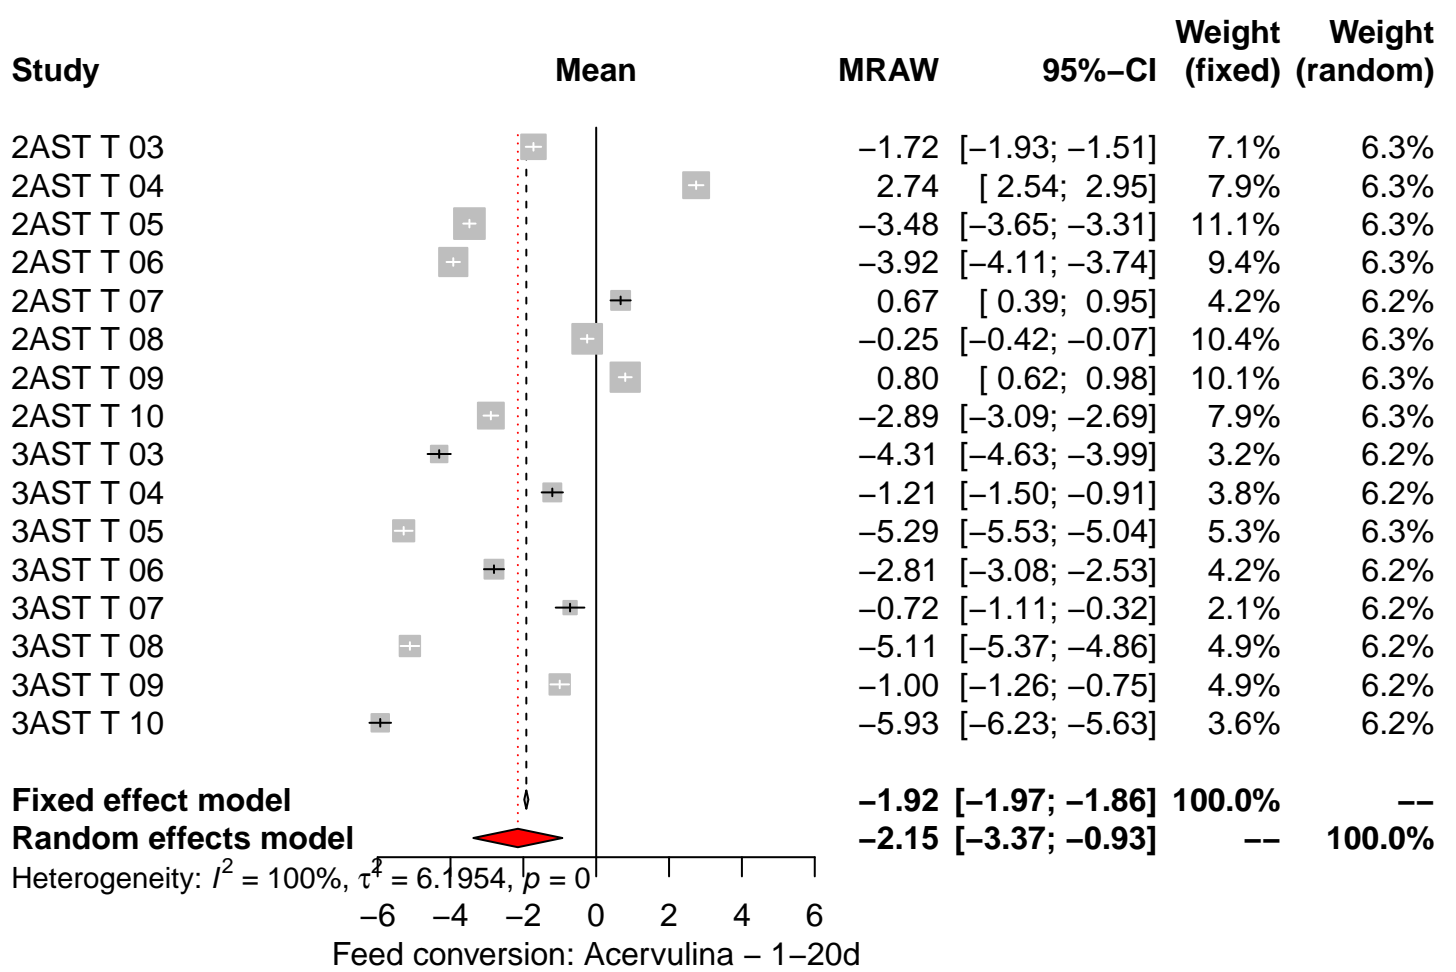

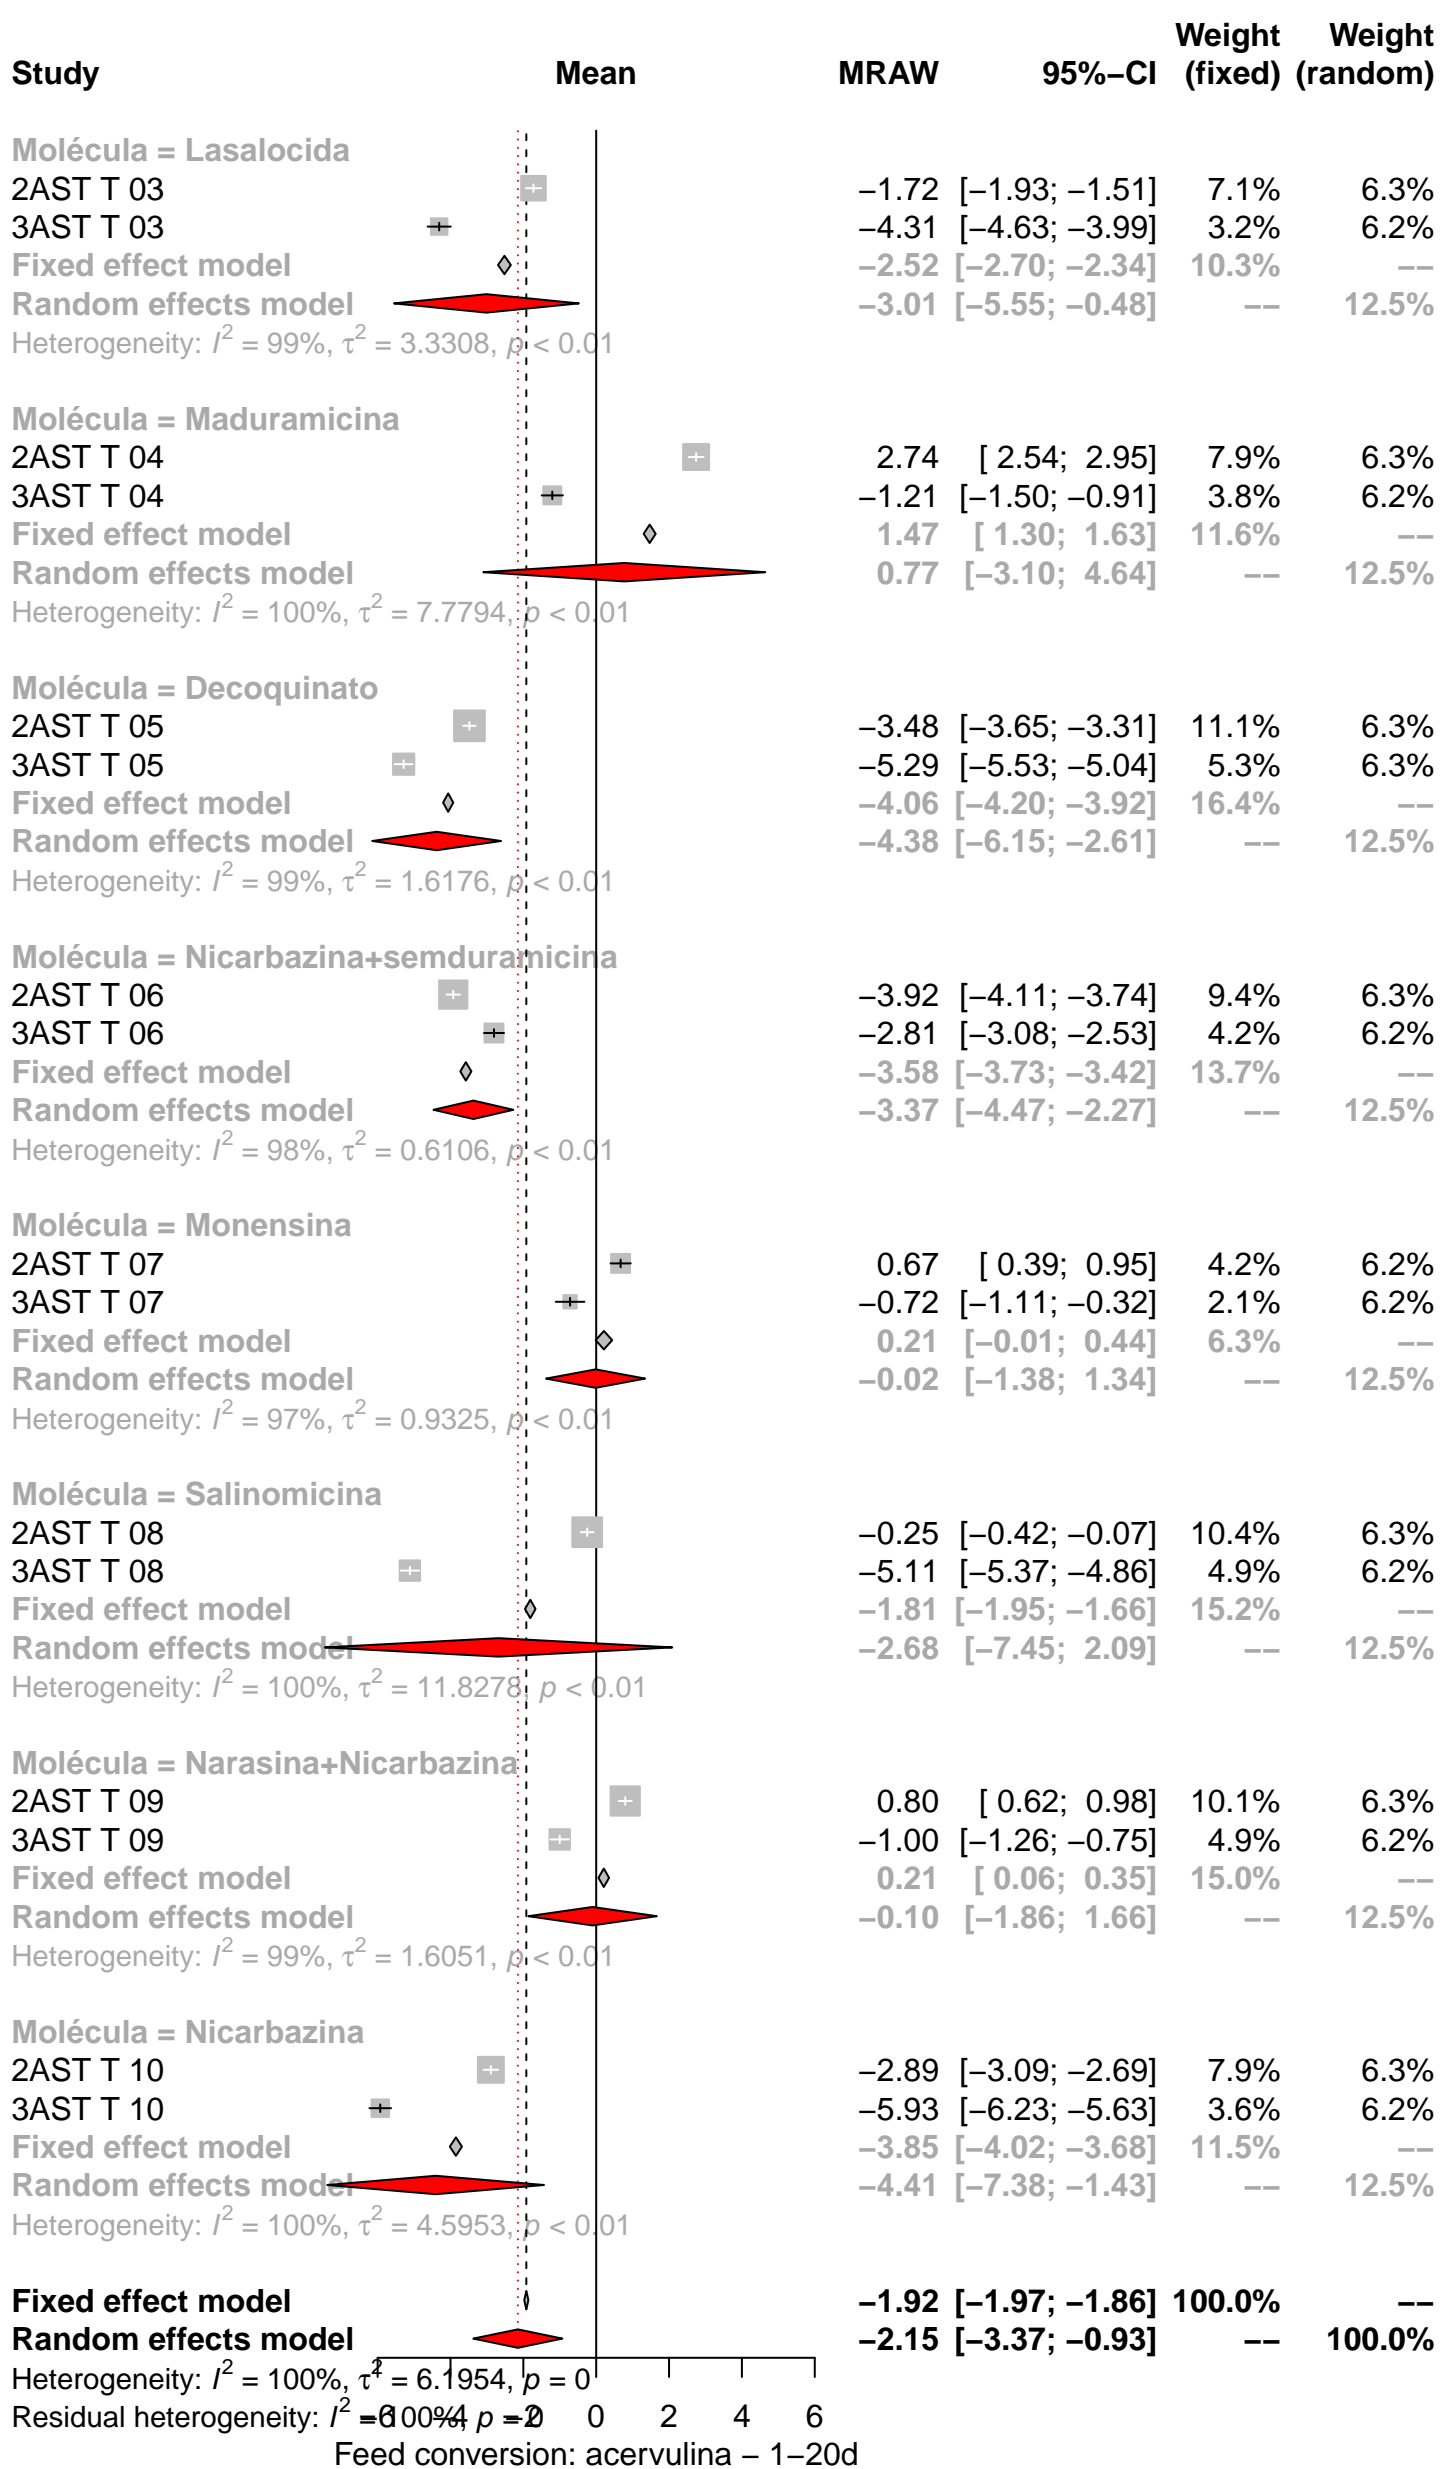

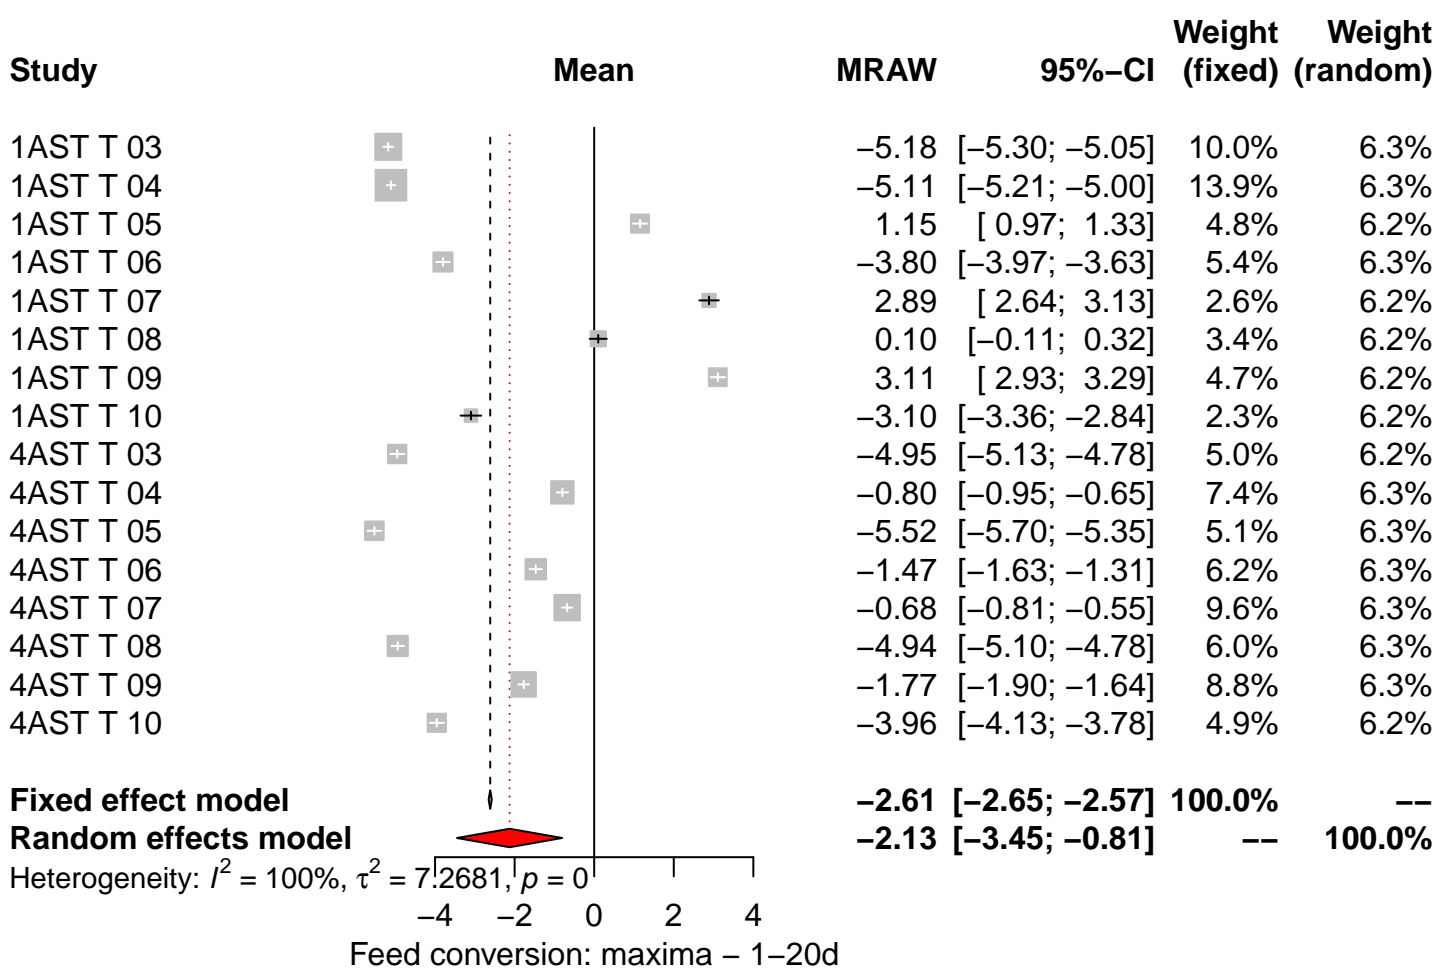



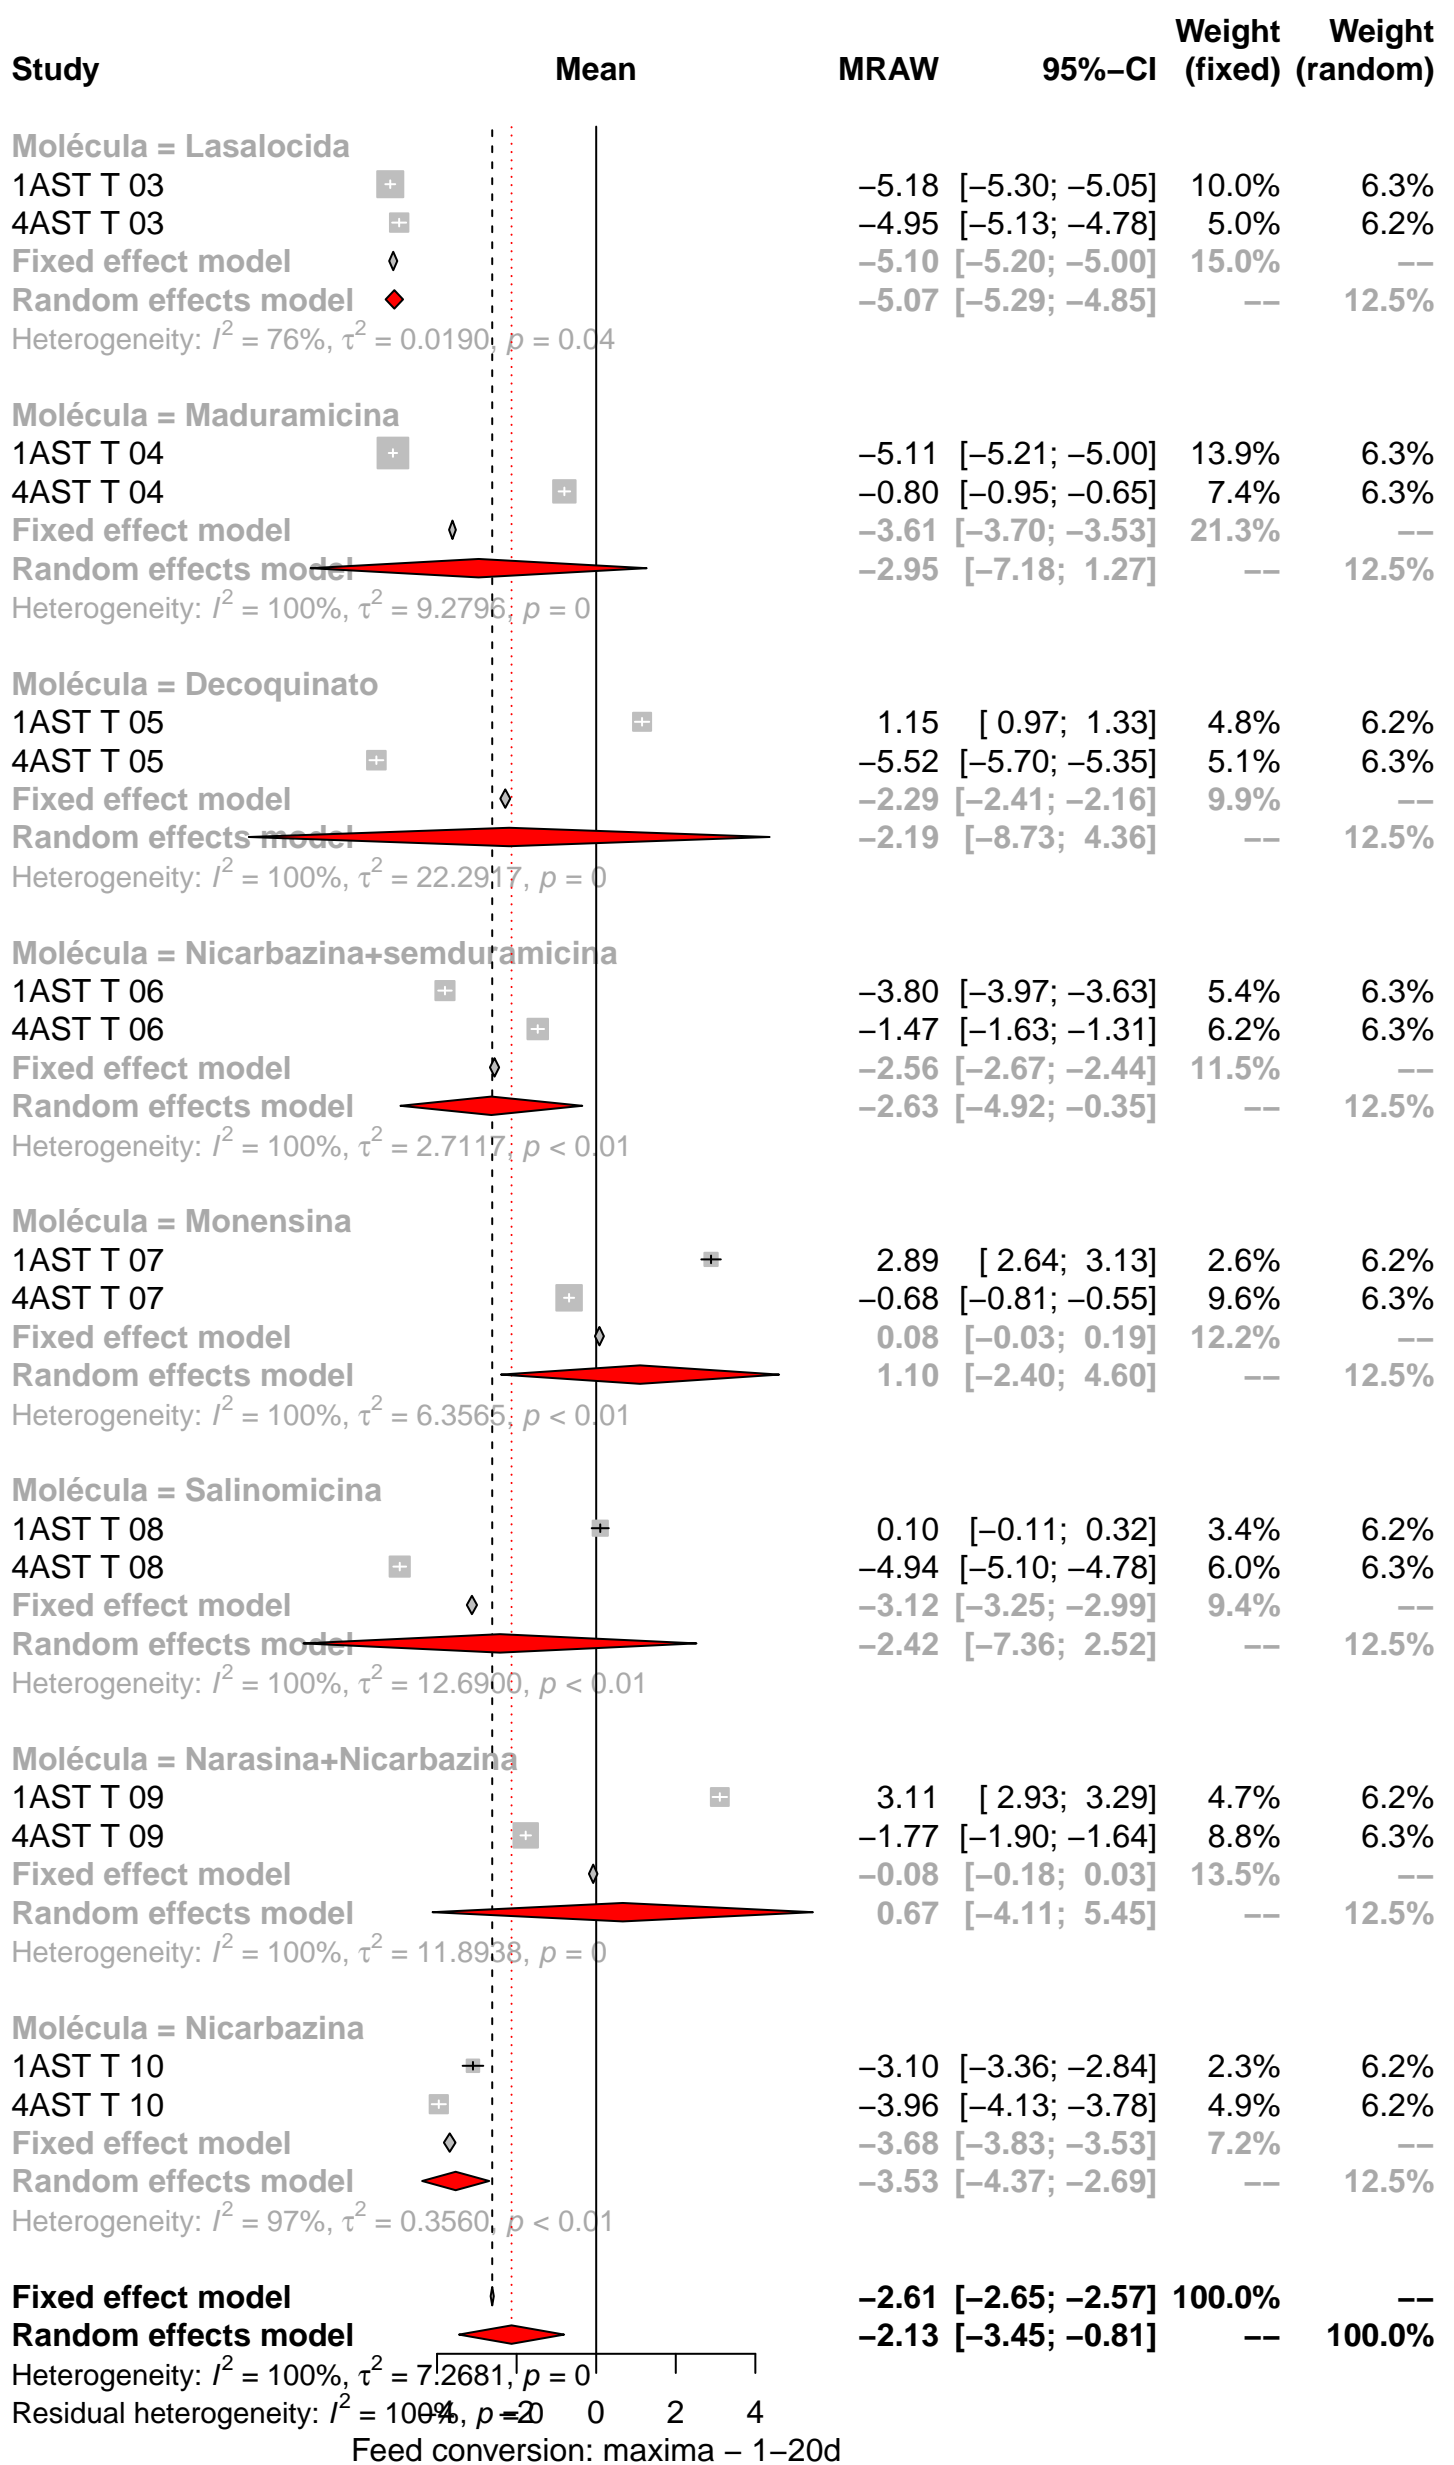

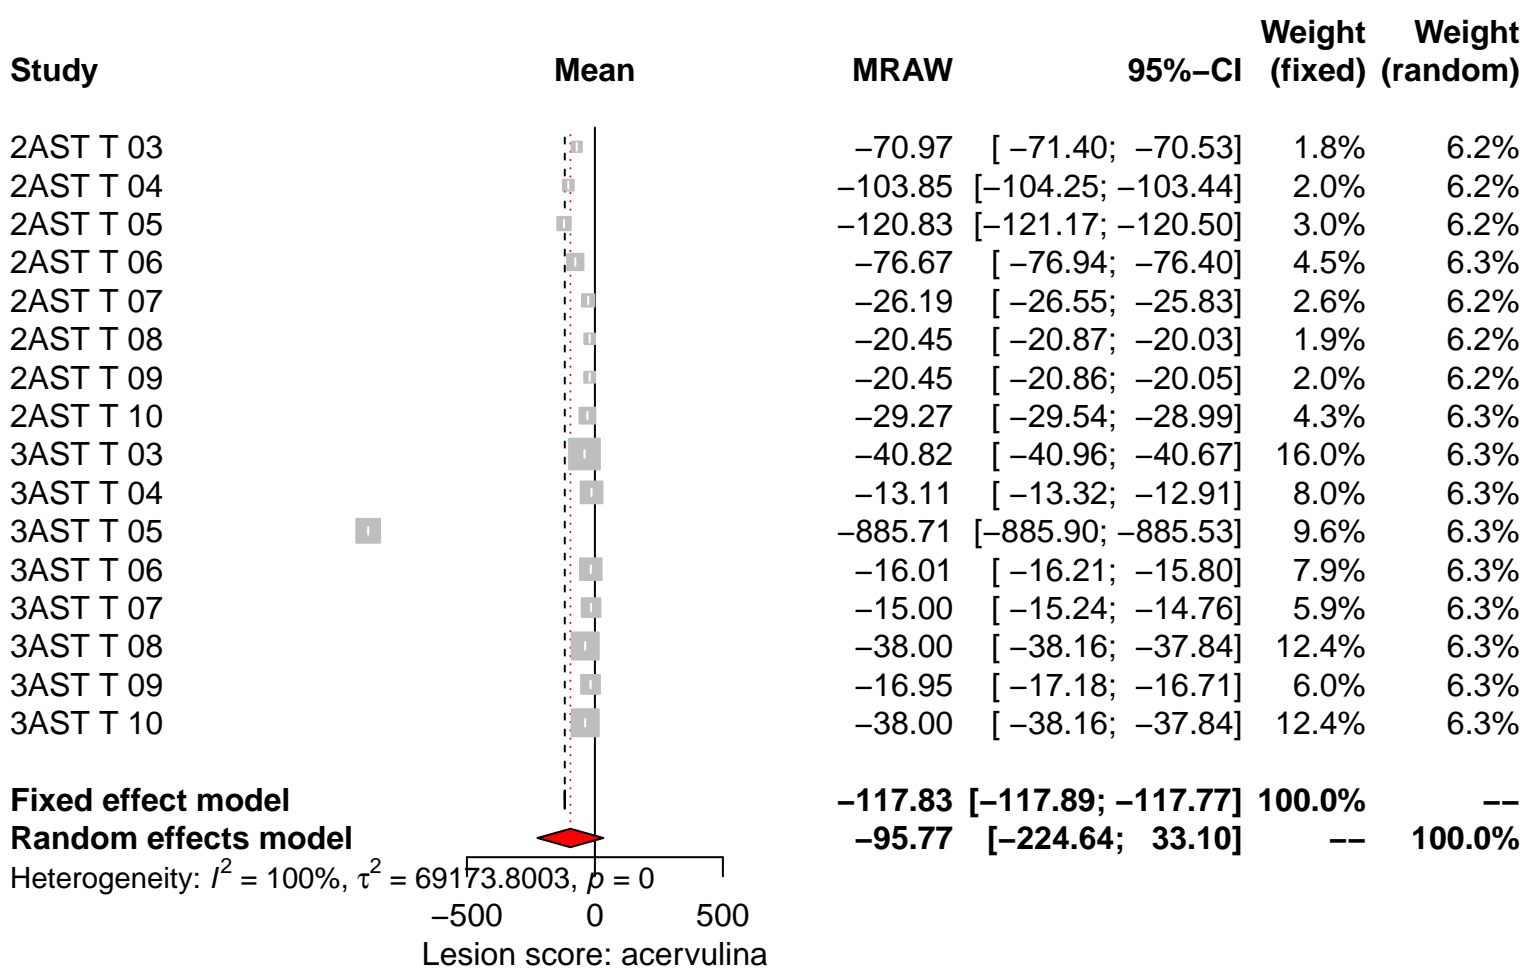

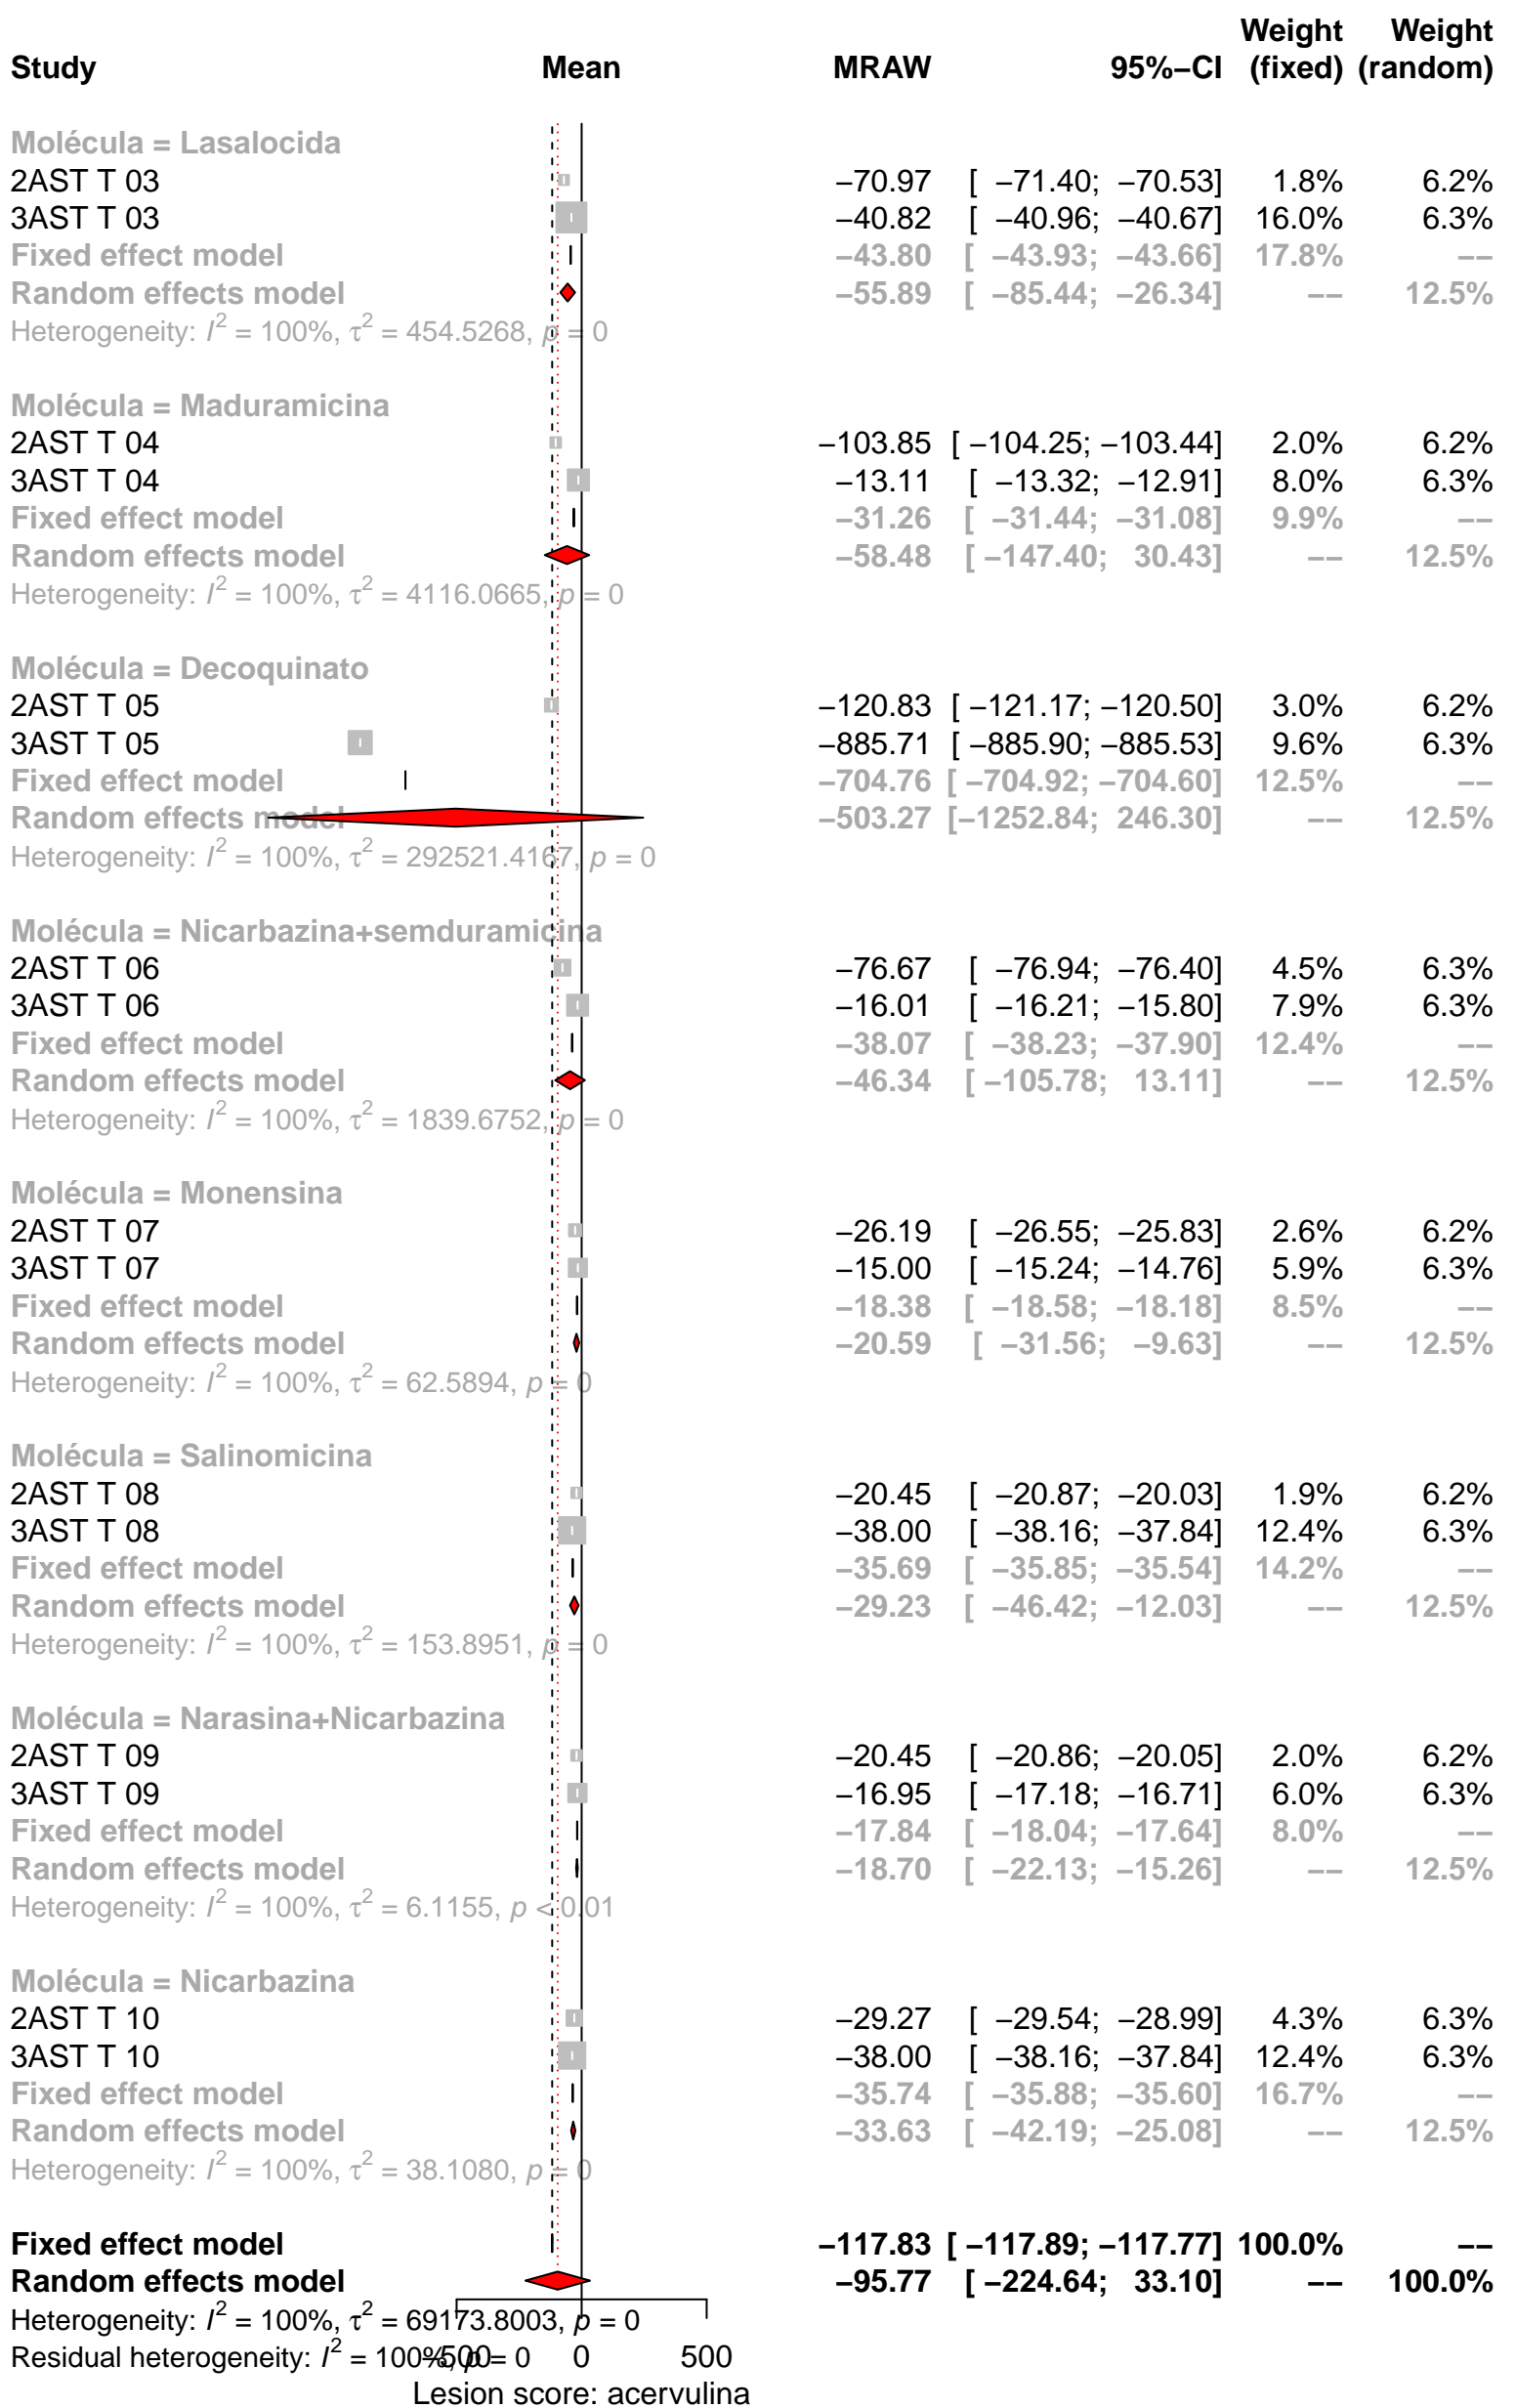

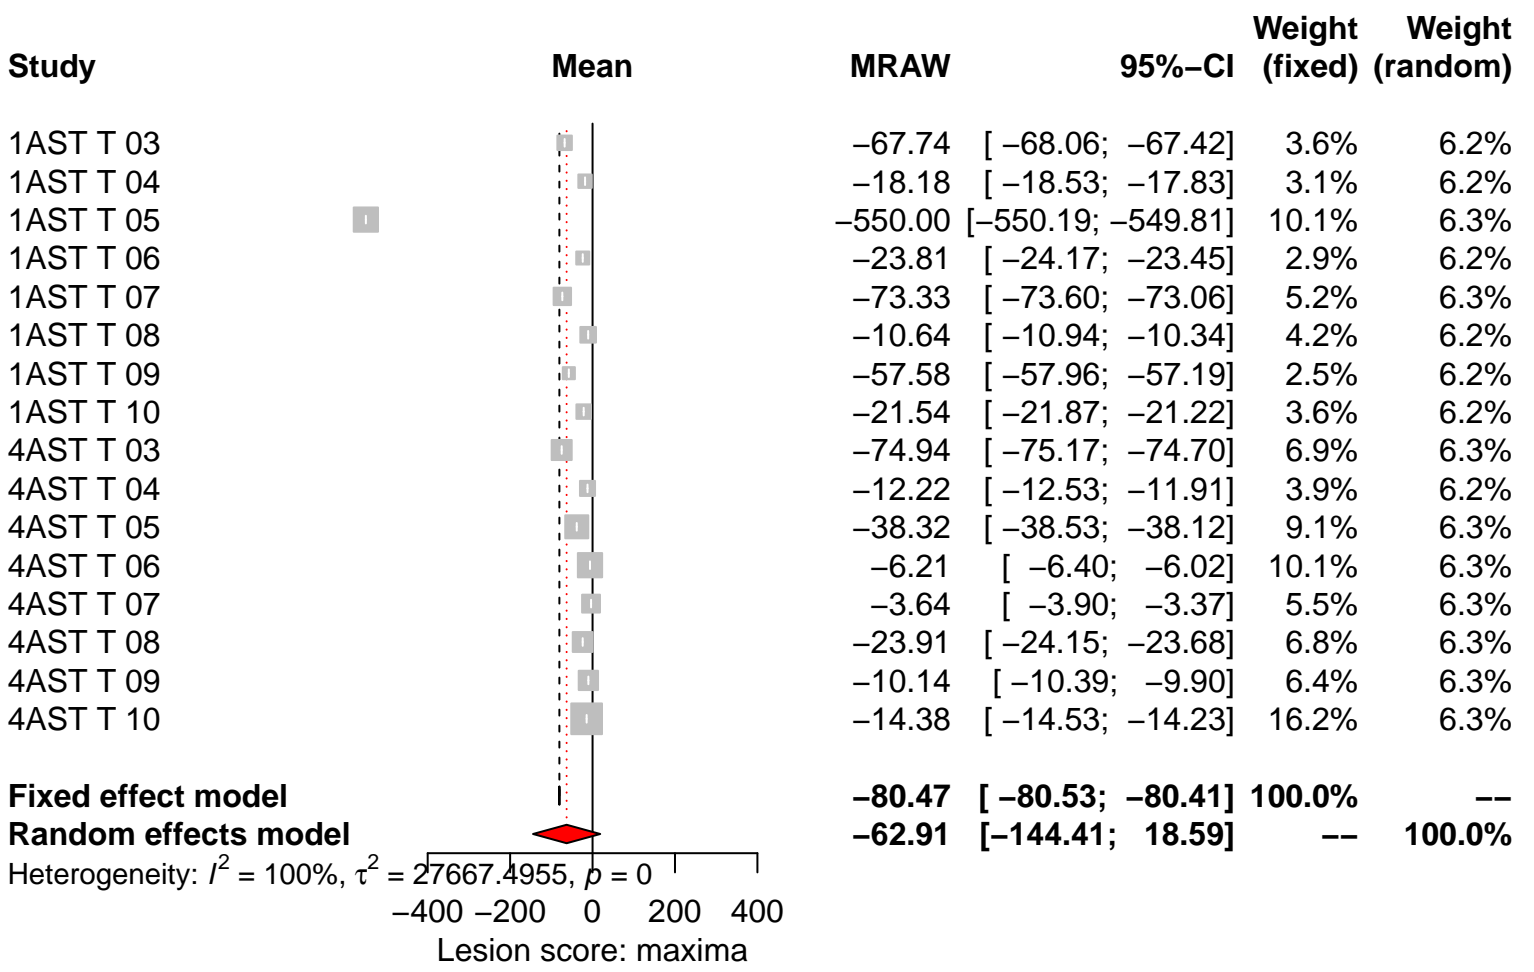

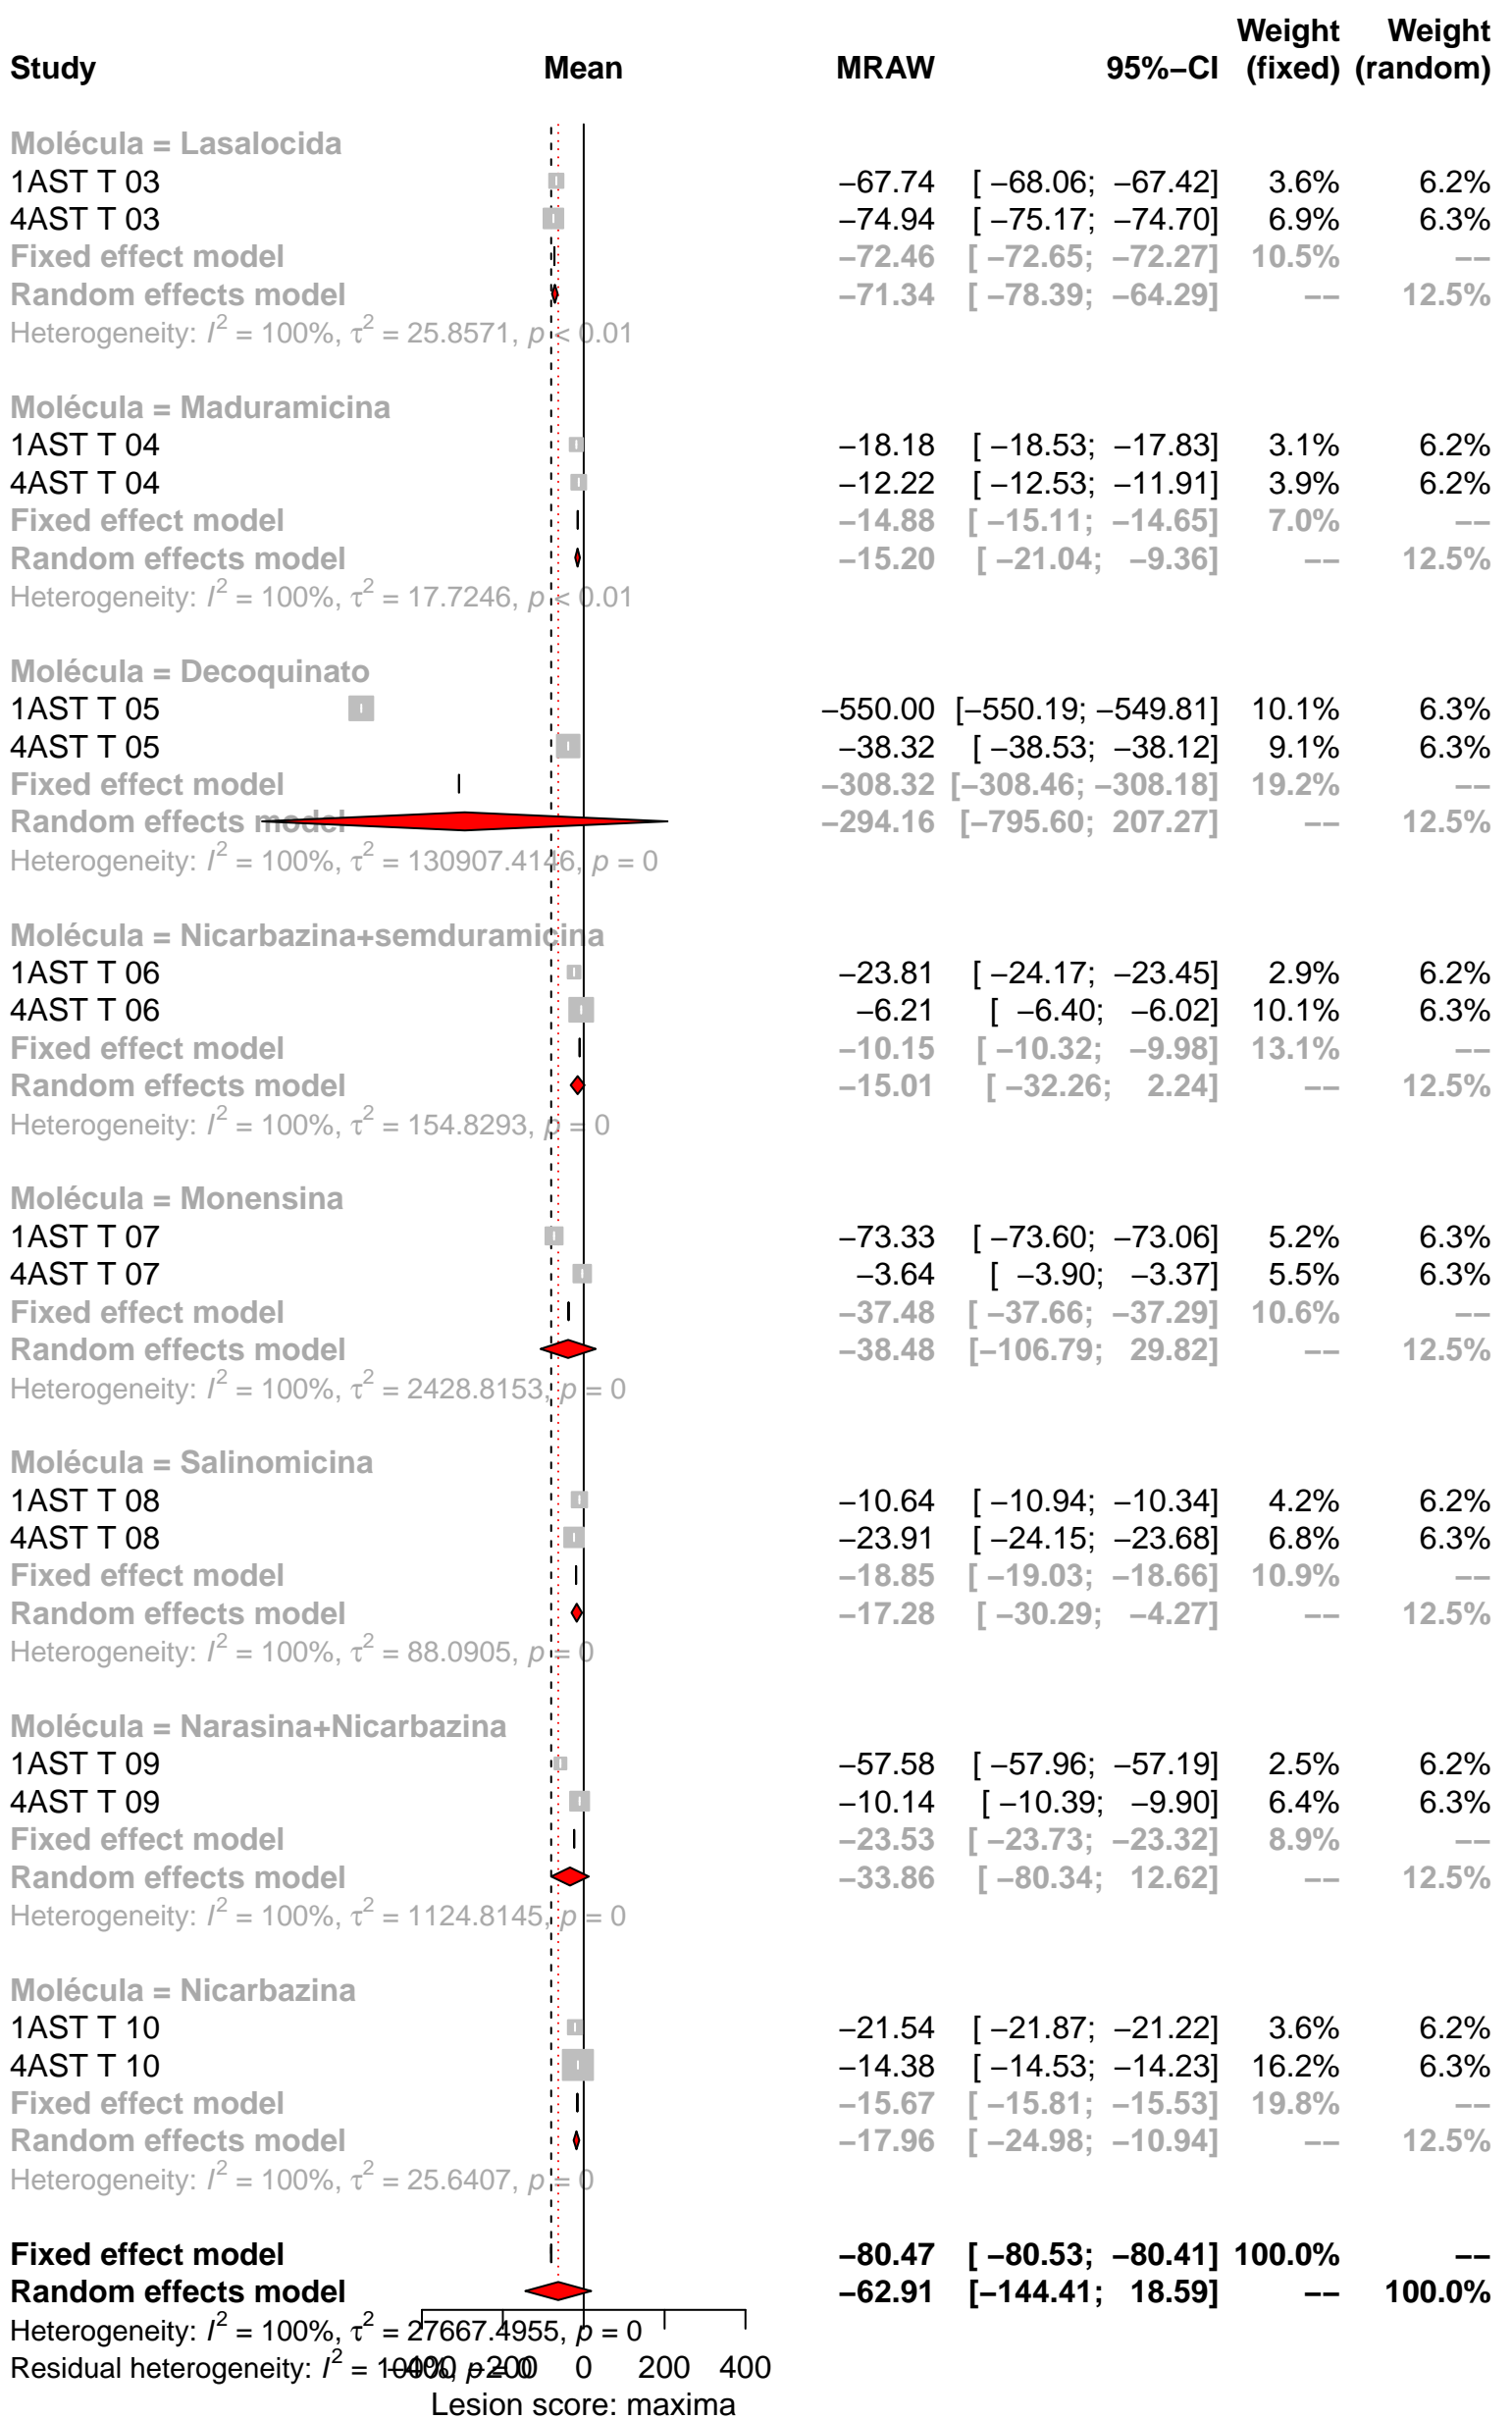

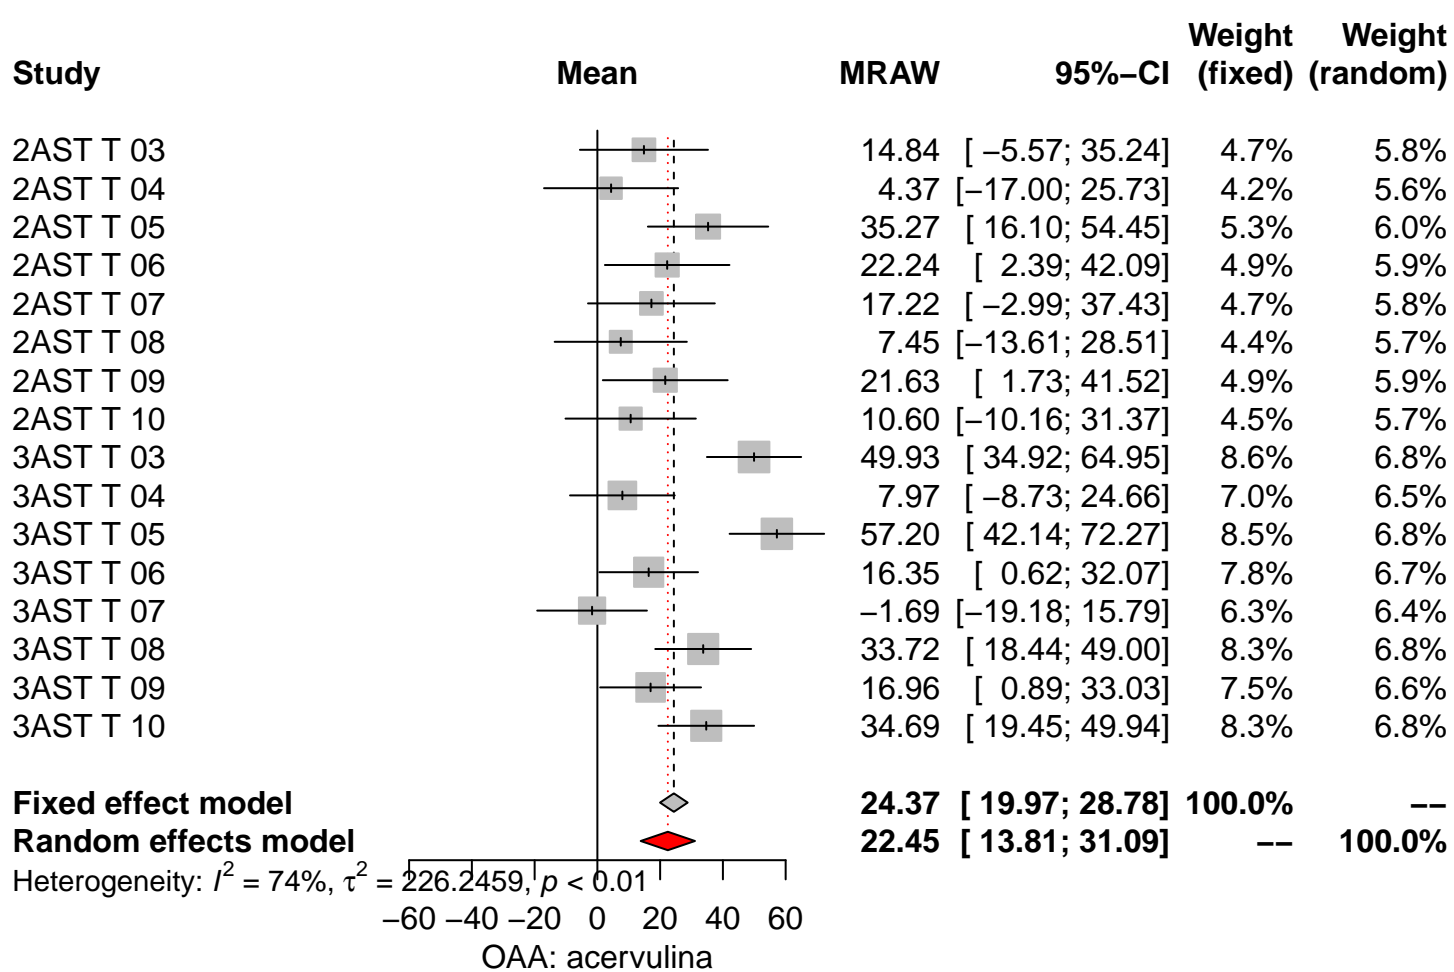

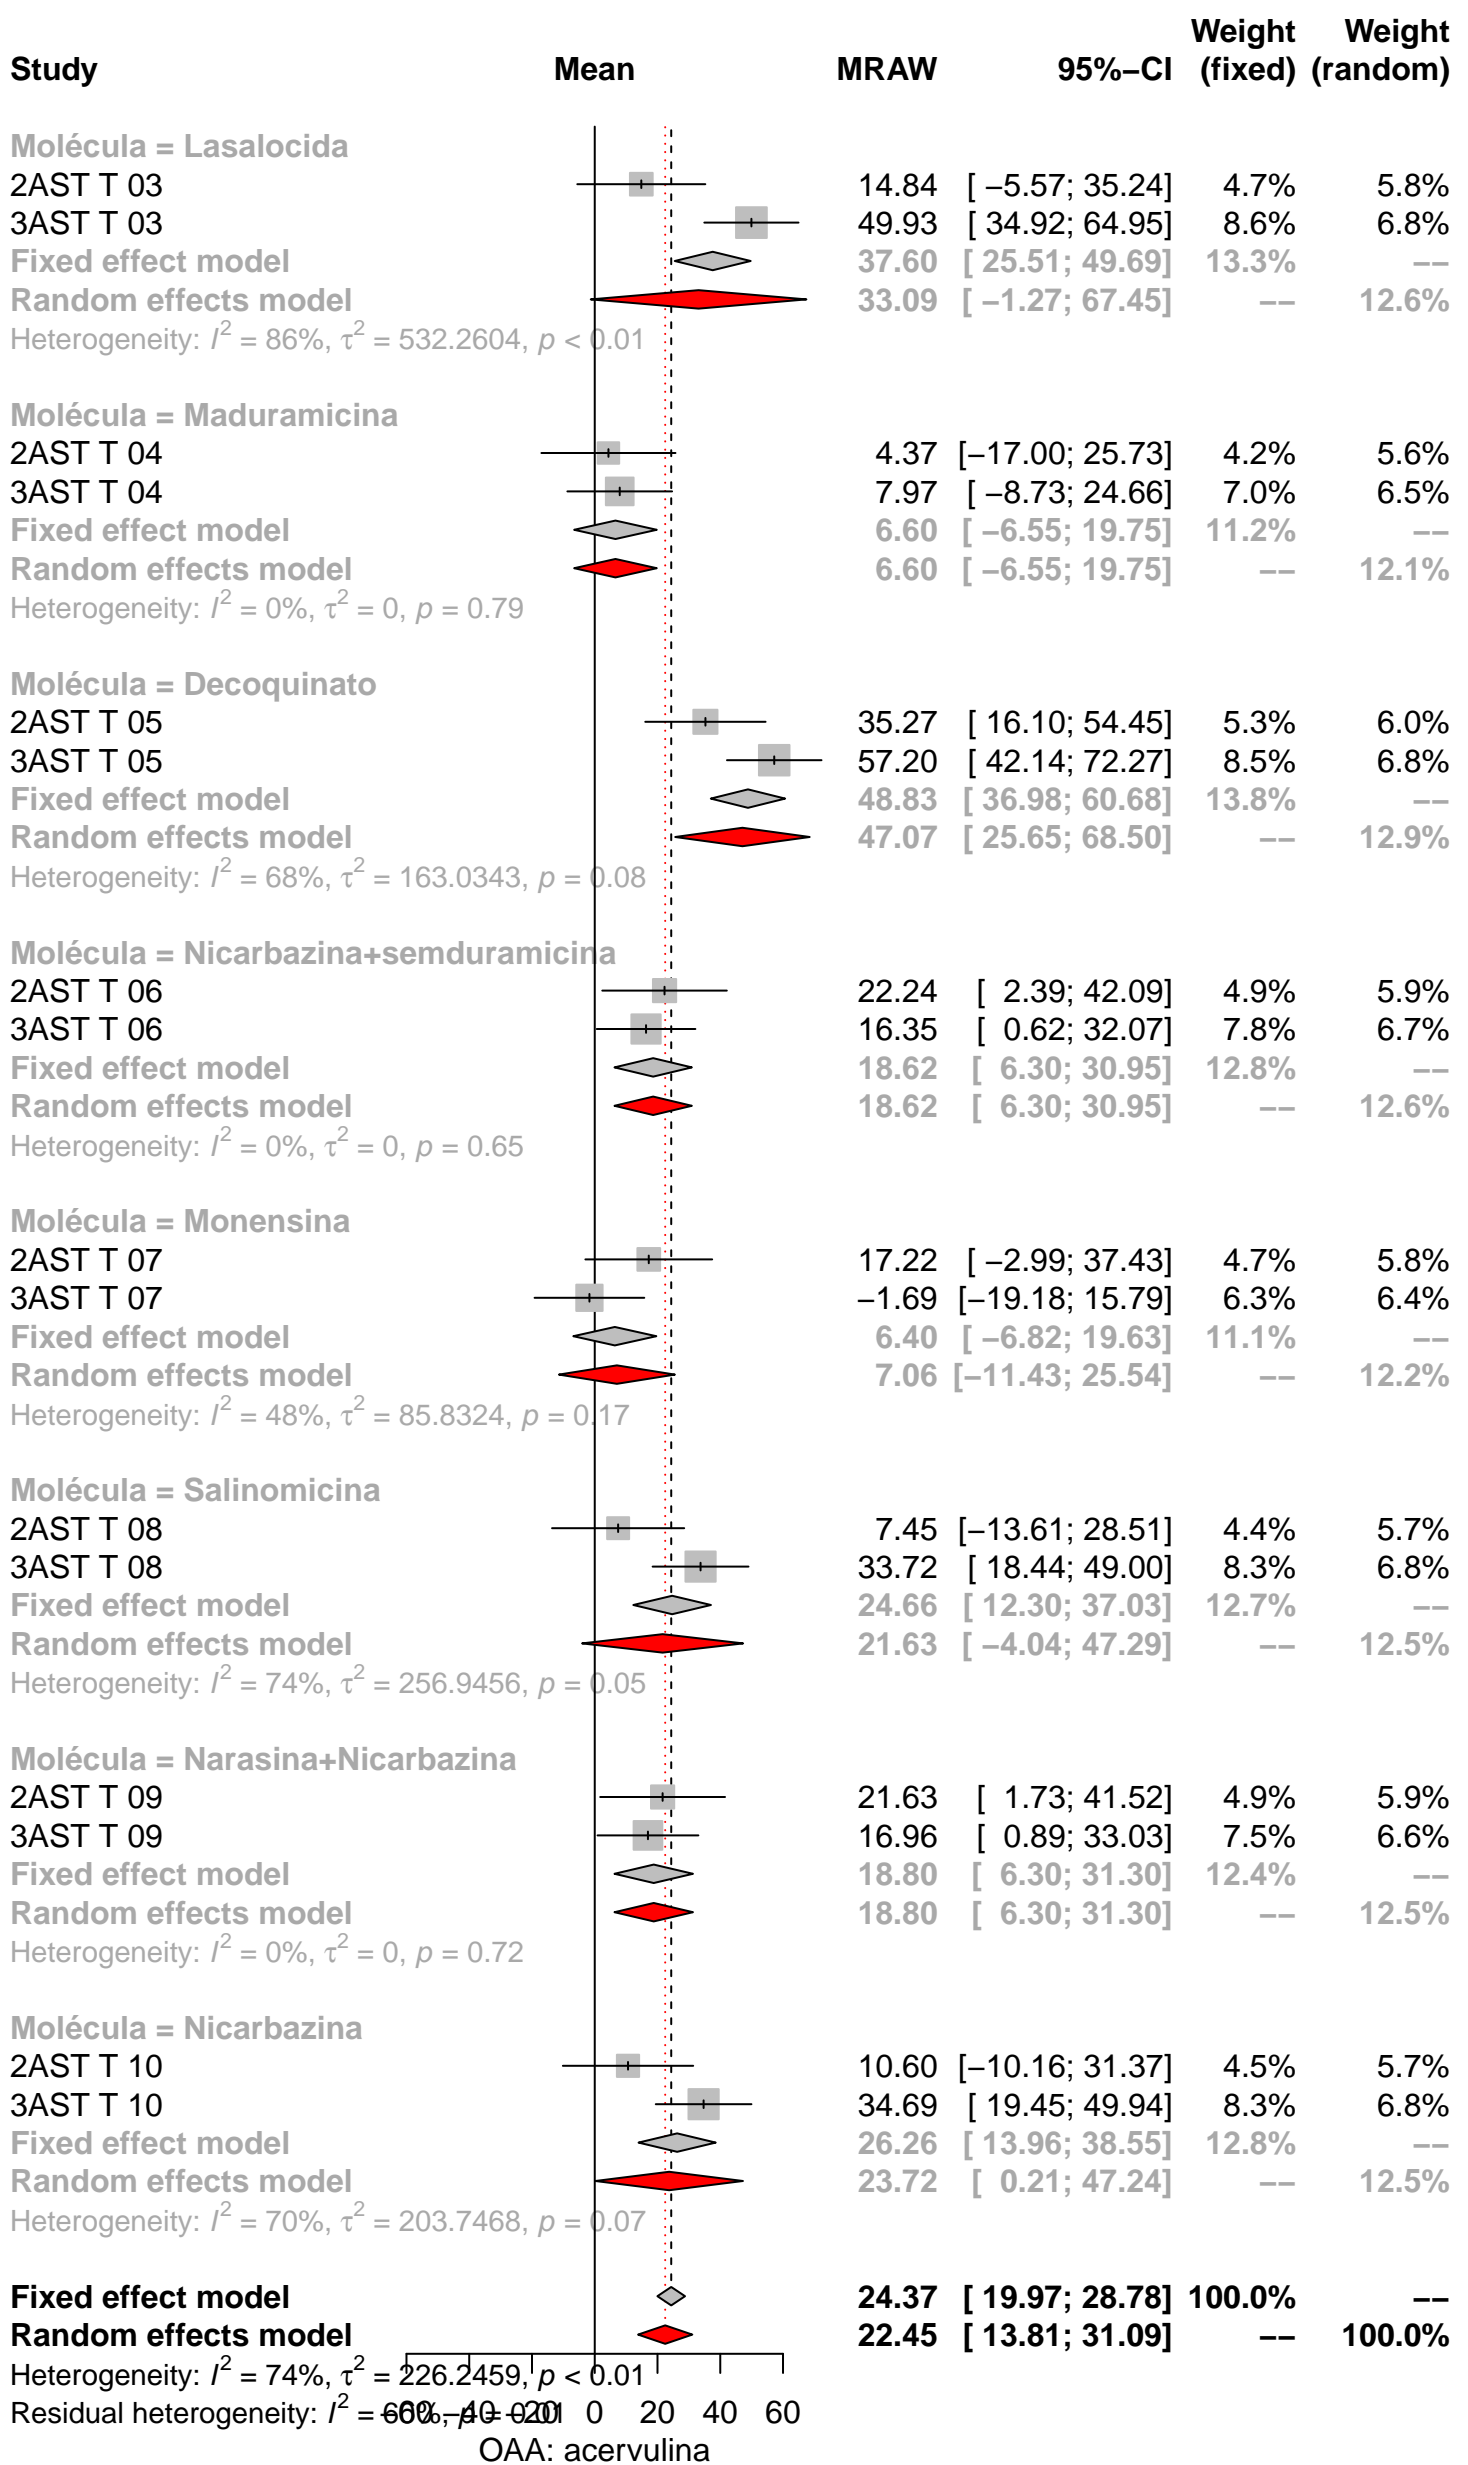

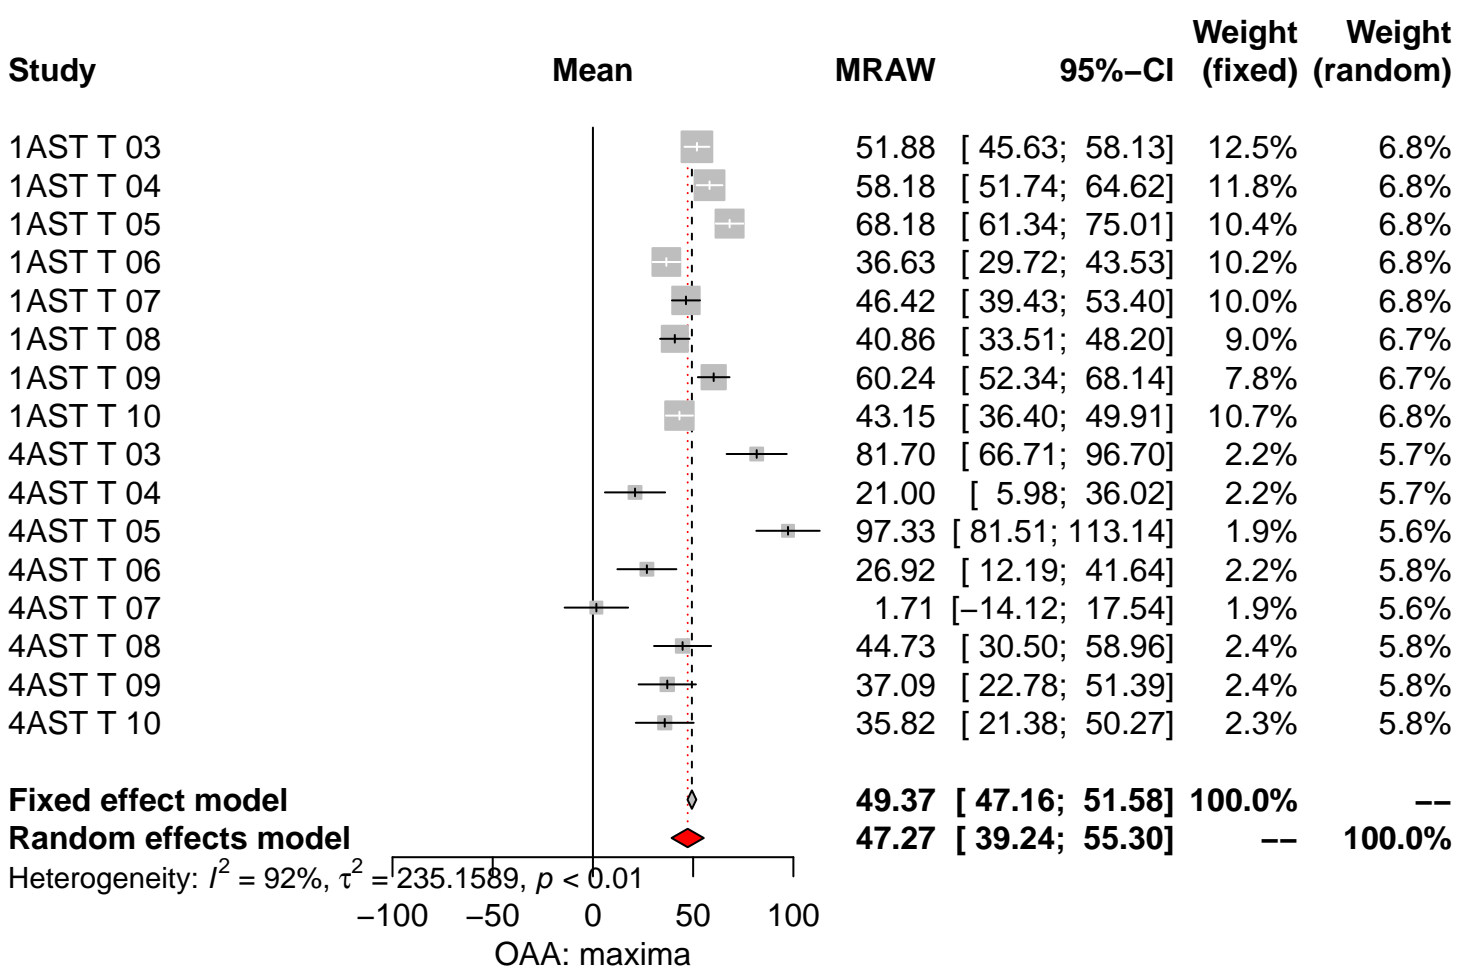



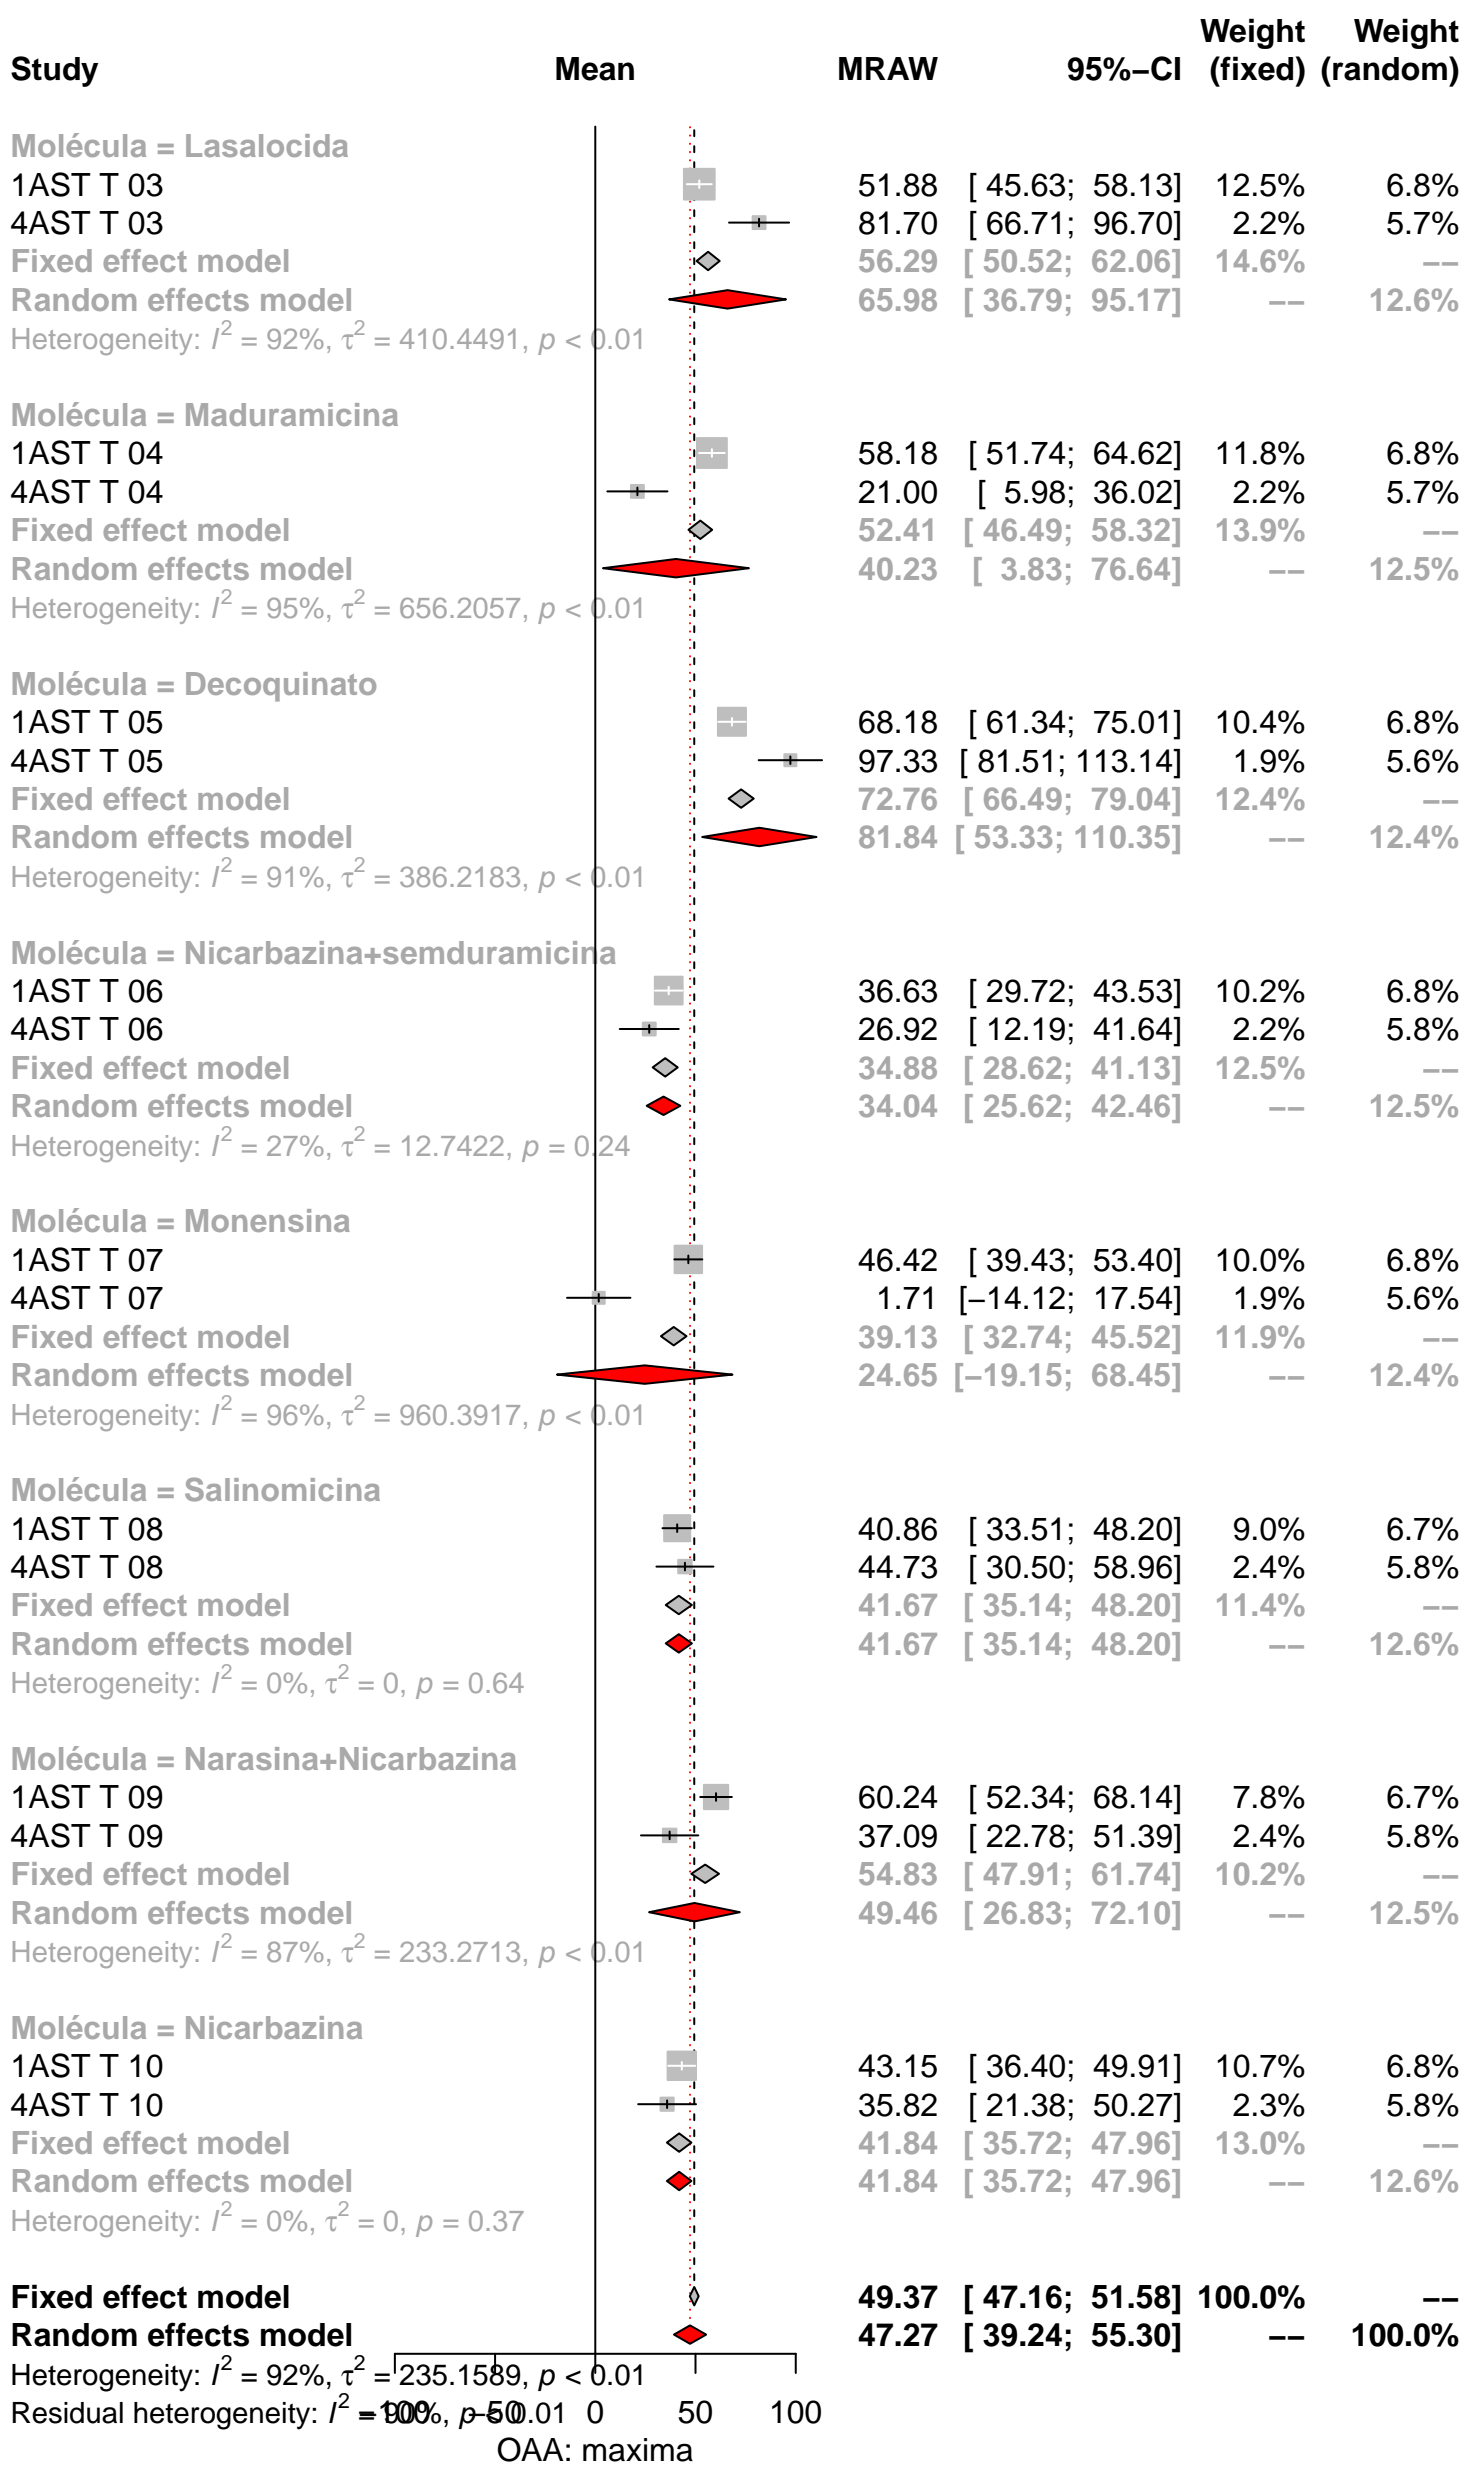

Supplement: mmc2.pdf [file mmc2.pdf]
